1  
2  
3  
4  
5  
6  
7  
8  
9  
10  
11  
12  
13  
14  
15  
16  
17  
18  
19  
20  
21

**The dual function monoclonal antibodies VIR-7831 and VIR-7832 demonstrate potent in vitro and in vivo activity against SARS-CoV-2**

Andrea L. Cathcart<sup>1</sup>, Colin Havenar-Daughton<sup>1</sup>, Florian A. Lempp<sup>1</sup>, Daphne Ma<sup>1</sup>, Michael A. Schmid<sup>2</sup>,  
Maria L. Agostini<sup>1</sup>, Barbara Guarino<sup>2</sup>, Julia Di iulio<sup>1</sup>, Laura E. Rosen<sup>1</sup>, Heather Tucker<sup>1</sup>, Joshua Dillen<sup>1</sup>,  
Sambhavi Subramanian<sup>1</sup>, Barbara Sloan<sup>1</sup>, Siro Bianchi<sup>2</sup>, Dora Pinto<sup>2</sup>, Christian Saliba<sup>2</sup>, Jason A  
Wojcechowskyj<sup>1</sup>, Julia Noack<sup>1</sup>, Jiayi Zhou<sup>1</sup>, Hannah Kaiser<sup>1</sup>, Arthur Chase<sup>1</sup>, Martin Montiel-Ruiz<sup>1</sup>,  
Exequiel Dellota Jr.<sup>1</sup>, Arnold Park<sup>1</sup>, Roberto Spreafico<sup>1</sup>, Anna Sahakyan<sup>1</sup>, Elvin J. Lauron<sup>1</sup>, Nadine  
Czudnochowski<sup>1</sup>, Elisabetta Cameroni<sup>1</sup>, Sarah Ledoux<sup>1</sup>, Adam Werts<sup>3</sup>, Christophe Colas<sup>1</sup>, Leah Soriaga<sup>1</sup>,  
Amalio Telenti<sup>1</sup>, Lisa A. Purcell<sup>1</sup>, Seungmin Hwang<sup>1</sup>, Gyorgy Snell<sup>1</sup>, Herbert W. Virgin<sup>1</sup>, Davide Corti<sup>2</sup>,  
Christy M. Hebner<sup>1\*</sup>

<sup>1</sup>Vir Biotechnology, San Francisco, California 94158, USA

<sup>2</sup>Humabs Biomed SA, a subsidiary of Vir Biotechnology, 6500 Bellinzona, Switzerland

<sup>3</sup>Lovelace Biomedical, Albuquerque, New Mexico 87108, USA

\*corresponding author: [hebner@vir.bio](mailto:hebner@vir.bio)

22 **ABSTRACT**

23 **VIR-7831 and VIR-7832 are dual action monoclonal antibodies (mAbs) targeting the spike**  
24 **glycoprotein of severe acute respiratory syndrome coronavirus 2 (SARS-CoV-2). VIR-7831 and**  
25 **VIR-7832 were derived from a parent antibody (S309) isolated from memory B cells of a 2003**  
26 **severe acute respiratory syndrome coronavirus (SARS-CoV) survivor. Both mAbs contain an “LS”**  
27 **mutation in the Fc region to prolong serum half-life and potentially enhance distribution to the**  
28 **respiratory mucosa. In addition, VIR-7832 encodes an Fc GAALIE mutation that has been shown**  
29 **previously to evoke CD8<sup>+</sup> T-cells in the context of an in vivo viral respiratory infection. VIR-7831**  
30 **and VIR-7832 potently neutralize wild-type and variant authentic virus in vitro as well as variant**  
31 **pseudotyped viruses. In addition, they retain activity against monoclonal antibody resistance**  
32 **mutations conferring reduced susceptibility to currently authorized mAbs. The VIR-7831/VIR-**  
33 **7832 epitope does not overlap with mutational sites in current variants of concern and continues to**  
34 **be highly conserved among circulating sequences consistent with the high barrier to resistance**  
35 **observed in vitro. Furthermore, both mAbs can recruit effector mechanisms in vitro that may**  
36 **contribute to clinical efficacy via elimination of infected host cells. In vitro studies with these mAbs**  
37 **demonstrated no enhancement of infection. In a Syrian golden hamster proof-of concept wildtype**  
38 **SARS-CoV-2 infection model, animals treated with VIR-7831 had less weight loss, and significantly**  
39 **decreased total viral load and infectious virus levels in the lung compared to a control mAb. Taken**  
40 **together, these data indicate that VIR-7831 and VIR-7832 are promising new agents in the fight**  
41 **against COVID-19.**

42

43 **INTRODUCTION**

44 The coronavirus disease (COVID-19) pandemic caused by severe acute respiratory syndrome coronavirus  
45 2 (SARS-CoV-2) has resulted in more than 153 million confirmed cases and over 3.2 million deaths

46 worldwide<sup>1</sup>. SARS-CoV-2 infection results in a broad range of disease severity<sup>2</sup>. Infection fatality rates  
47 increase significantly with age, with 28.3% of COVID-19 patients over the age of 85 succumbing to  
48 disease<sup>2</sup>. However, even in mild-to-moderate COVID-19 patients, significant post-infection sequelae can  
49 affect overall health and cause long-term disability<sup>3</sup>. While multiple SARS-CoV-2 vaccines are now  
50 authorized for use, issues of supply, vaccine hesitancy and emergence of variants may prevent rapid  
51 attainment of herd immunity<sup>4-9</sup>. In addition, there may be individuals who remain at risk despite  
52 vaccination due to disease or underlying immunodeficiency. Thus, additional interventions and potential  
53 prophylactic agents are needed to reduce morbidity and mortality due to COVID-19.

54 Several monoclonal antibodies (mAbs) targeting the SARS-CoV-2 spike protein have recently been  
55 authorized for use in early treatment of COVID-19 patients<sup>10-13</sup> and clinical data have been reported to  
56 show promising results in treatment and prophylactic studies<sup>12-15</sup>. However, rapidly spreading variants  
57 including those from the United Kingdom (B.1.1.7), South Africa (B.1.351) and Brazil (P.1) exhibit  
58 reduced susceptibility in vitro to currently authorized antibodies that target the receptor binding motif  
59 (RBM) of the viral spike (S) glycoprotein<sup>10,11,16,17</sup>. Therefore, mAbs targeting unique S epitopes are  
60 needed for use alone or in combination with current agents for the treatment and prevention of COVID-  
61 19. Furthermore, in addition to viral neutralization, antibodies possessing potent effector function to aid in  
62 the killing of virally infected cells and the elicitation of T cell immunity could significantly assist in  
63 halting disease progression<sup>18-20</sup>.

64 VIR-7831 and VIR-7832 are dual action mAbs derived from the parent antibody S309 identified from a  
65 2003 SARS-CoV survivor<sup>21</sup>. These mAbs target an epitope containing a glycan (at position N343) that is  
66 highly conserved within the Sarbecovirus subgenus in a region of the S receptor binding domain (RBD)  
67 that does not compete with angiotensin converting enzyme 2 (ACE2) binding<sup>22</sup>. This epitope does not  
68 overlap with mutations observed in current variants of concern<sup>10,11,16,17</sup>. The variable region of VIR-7831  
69 and VIR-7832 have been engineered for enhanced developability. In addition, both antibodies possess an  
70 Fc “LS” mutation that confers extended half-life by binding to the neonatal Fc receptor and potentially

71 enhances distribution to the respiratory mucosa<sup>23–25</sup>. VIR-7832 is identical to VIR-7831 with the  
72 exception of the addition of a 3 amino acid GAALIE (G236A, A330L, I332E) modification to the Fc  
73 domain<sup>26</sup>. The GAALIE modification has previously been shown in vitro to enhance binding to FcγIIa  
74 and FcγIIIa receptors, decrease affinity for FcγIIb compared to typical IgG1 and evoke protective CD8+  
75 T-cells in the context of viral respiratory infection in vivo<sup>27,28</sup>.

76 Here we characterize the antiviral potential of VIR-7831 and VIR-7832. These mAbs effectively  
77 neutralize SARS-CoV-2 live virus in vitro as well as in pseudotyped virus assays against emerging  
78 variants of concern and variants that confer resistance to currently authorized mAbs<sup>29</sup>. In addition to the  
79 neutralizing capacity, both antibodies demonstrate potent effector function and mediate antibody  
80 dependent cellular cytotoxicity (ADCC) and antibody dependent cellular phagocytosis (ADCP) in vitro.  
81 Furthermore, resistance selection experiments and epitope conservation analyses indicate the potential for  
82 a high barrier to resistance. Data derived from the Syrian golden hamster model demonstrates efficacy in  
83 a proof-of-concept in vivo model. Taken together, these data indicate that VIR-7831 and VIR-7832 are  
84 promising key components of the arsenal in the fight against COVID-19.

## 85 **RESULTS**

### 86 **VIR-7831 and VIR-7832 bind SARS-CoV-2 spike and effectively neutralize live virus in vitro.**

87 Previously published work showed that S309 bound SARS-CoV-2 recombinant and cell surface-  
88 associated S and neutralized live virus in vitro<sup>21</sup>. We initiated these studies by repeating and extending  
89 these earlier results. To determine the binding activity of VIR-7831 and VIR-7832 to the SARS-CoV-2 S,  
90 enzyme-linked immunosorbent assay (ELISA), surface plasmon resonance (SPR) and flow cytometry  
91 assays were utilized. VIR-7831 and VIR-7832 bound to recombinant S RBD (amino acids 331-541) with  
92 EC<sub>50</sub> values of 20.40 ng/mL and 14.9 ng/mL, respectively, by ELISA (**Figure 1a**). Using SPR, both  
93 antibodies demonstrated potent binding to recombinant S RBD with an equilibrium constant (K<sub>d</sub>) of 0.21  
94 nM (**Figure 1b**). As antibody recognition of cell surface-bound S could mediate killing of virally infected  
95 cells, flow cytometry-based studies using cells transiently transfected with a S-encoding plasmid were

96 used to examine antibody binding to cell surface-expressed S trimer. By this method, both VIR-7831 and  
97 VIR-7832 bound efficiently to surface-expressed S (**Figure 1c**).

98 To examine neutralization capacity, VIR-7831 and VIR-7832 were tested in a VeroE6 cell-based live  
99 SARS-CoV-2 virus system against the Washington 2019 (wild-type) virus as well as against the UK  
100 (B.1.1.7), South Africa (B.1.351) and Brazil (P.1) variants. Concentration-dependent viral neutralization  
101 of the Washington 2019 strain was observed for both antibodies, with geometric mean  $IC_{50/90}$  values of  
102 100.1/186.3 ng/mL and 78.3/253.1 ng/mL, respectively (**Figure 1d**).  $IC_{50/90}$  values observed for VIR-7831  
103 and VIR-7832 against the South Africa and Brazil variant viruses were similar to those against the wild-  
104 type strain. A slight shift in the VIR-7831/VIR-7832  $IC_{50/90}$  compared to wild-type was observed for the  
105 UK variant. VIR-7831 showed a 3-fold and 4.1-fold shift in  $IC_{50}$  and  $IC_{90}$ , respectively, against the UK  
106 variant compared to wild-type while VIR-7832 had a 3.1-fold shift in  $IC_{50}$  and 3.7-fold shift in  $IC_{90}$  versus  
107 wild-type (**Figure 1d, Table 1**). As variant evolution is a natural part of SARS-CoV-2 biology and  
108 emerging live virus variants are not always readily accessible for testing, a vesicular stomatitis virus  
109 (VSV)-based pseudotyped virus system targeting Vero E6 cells was used to examine VIR-7831 and VIR-  
110 7832 neutralization against emergent variants (**Table 2**). Fold-changes in VIR-7831 and VIR-7832  $IC_{50}$   
111 values compared to wild-type against pseudotyped virus expressing spike from the South Africa, UK or  
112 Brazil variant were similar to those observed in the authentic virus system. VIR-7831 was tested against  
113 an extended panel of pseudotyped viruses incorporating key variants from around the globe. Fold-changes  
114 in VIR-7831  $IC_{50}$  values against these variants ranged from 0.6- to 1.7-fold indicating that VIR-7831  
115 retains activity against these spike variants (**Table 2**).

116 **VIR-7831 and VIR-7832 exhibit potent effector function in vitro.** Although direct antiviral  
117 mechanisms are crucial to provide protection, Fc-dependent mechanisms mediated by interaction with Fc  
118 gamma receptors ( $Fc\gamma R$ s) on immune cells or with complement, can contribute to overall potency in vivo.  
119 The potential for VIR-7831 and VIR-7832 to mediate effector functions were assessed in vitro by

120 measuring binding to FcγRs and C1q and in assays designed to demonstrate antibody-dependent cellular  
121 cytotoxicity (ADCC) or antibody-dependent cellular phagocytosis (ADCP)<sup>31-34</sup>.

122 Antibody binding to the human activating FcγRIIa (low-affinity R131 and high affinity H131 alleles),  
123 FcγRIIIa (low-affinity F158 and high-affinity V158 alleles), and to the inhibitory FcγRIIb were examined  
124 using SPR (**Supplemental figure 1a**). VIR-7831 similarly bound both the H131 and R131 alleles of  
125 FcγRIIa and binds FcγRIIb. VIR-7831 bound both FcγRIIIa alleles, with reduced binding to the F158  
126 allele compared to V158, as is characteristic for human IgG1<sup>35</sup>. Binding of VIR-7831 to C1q was similar  
127 to the parental antibody (S309-LS) (**Supplemental figure 1b**). As previously reported for antibodies  
128 encoding the GAALIE mutation<sup>26,36</sup>, VIR-7832 bound with comparatively higher affinity to activating  
129 FcγRIIa and FcγRIIIa than VIR-7831 (**Supplemental figure 1a**). Conversely, VIR-7832 showed reduced  
130 affinity for FcγIIb and abrogation of binding to C1q (**Supplemental figure 1b**).

131 The antibodies were also assessed for the ability to activate human FcγRIIa, FcγRIIb or FcγRIIIa, using a  
132 Jurkat cell reporter assay<sup>37</sup> (**Figure 2a-d**). S309-GRLR, which contains the effector function-abrogating  
133 G236R, L328R mutations was used as a negative control. Cells stably transfected with the SARS-CoV-2  
134 spike protein (CHO-CoV-2-Spike) served as target cells. Both VIR-7831 and the parental S309-LS  
135 activated signaling of the higher-affinity allele FcγRIIa (H131) but did so less efficiently than the  
136 GAALIE-containing antibody VIR-7832 (**Figure 1a**) while VIR-7831, VIR-7832 and S309-LS induced  
137 similar low-level activation of the inhibitory receptor FcγRIIb (**Figure 1b**). VIR-7831 demonstrated  
138 substantially lower activation of FcγRIIIa F158 versus V158 as expected while VIR-7832 showed  
139 increased activation of both alleles of FcγRIIIa (F158 and V158) (**Figures c,d**).

140 To further elucidate the effector function potential of the antibodies, ADCC and ADCP assays were  
141 performed using donor PBMCs or NK cells as effector cells and CHO cells stably expressing S (CHO-  
142 CoV-2-Spike) as target cells (**Figure 2e-g**). The ability of antibodies to activate NK cell-mediated killing  
143 was measured in vitro using two genotyped donors expressing homozygous low-affinity (F/F158) or high-  
144 affinity (V/V158) (**Figure 2e-f**). Compared to the parental mAb S309-LS, VIR-7831 had slightly

145 increased capacity to induce NK cell-mediated ADCC when using cells from either F/F158 or V/V158  
146 donors. As expected, VIR-7832 induced NK cell-mediated ADCC in cells from donors expressing the  
147 low-affinity F/F158 allele of FcγIIIa more efficiently than VIR-7831. These results were confirmed with  
148 NK cells from a heterozygous donor (F/V 158).

149 The ability of VIR-7831 and VIR-7832 to facilitate ADCP by primary CD14<sup>+</sup> monocytes was measured in  
150 vitro by exposing freshly isolated human PBMCs to CHO-CoV-2-Spike cells that were pre-incubated  
151 with antibody (**Figure 2g**). VIR-7831, VIR-7832 and S309-LS induced similar levels of ADCP by CD14<sup>+</sup>  
152 monocytes. These results indicate that VIR-7831 and VIR-7832 have the potential to trigger ADCC and  
153 ADCP of cells displaying SARS CoV-2 S protein.

154 **Subneutralizing levels of VIR-7831 and VIR-7832 do not enhance virus uptake, replication or**  
155 **cytokine production in vitro.** One potential concern with any antibody therapeutic targeting a viral agent  
156 is the possibility of antibody-dependent enhancement (ADE). ADE is an in vivo phenomenon in which  
157 the presence of an antibody worsens disease. There are several in vitro assays that may provide plausible  
158 correlates for ADE in vivo, though none of these have been proven relevant to COVID-19 as to date ADE  
159 has not been observed in trials of monoclonal antibodies or plasma<sup>13,15,38,39</sup>. ADE can occur by several  
160 potential mechanisms<sup>40</sup>. Poorly neutralizing antibodies or subneutralizing levels of antibody could  
161 theoretically facilitate enhanced virus entry and infection through Fc receptor interactions. A second  
162 theoretical mechanism involves antibody-antigen complex formation leading to enhanced cytokine  
163 production. A third mechanism of ADE has been observed in a porcine model of influenza where the  
164 kinetics of viral fusion to the target cell was enhanced in a Fab-dependent manner by fusion-enhancing  
165 non-neutralizing antibodies<sup>41,42</sup>.

166 To explore whether VIR-7831 and VIR-7832 exhibit in vitro activities that might be related to ADE in  
167 vivo, we evaluated SARS-CoV-2 replication in human cells that express FcγRs: monocyte-derived  
168 dendritic cells (moDCs), peripheral blood mononuclear cells (PBMCs) and the human U937 macrophage  
169 cell line (**Supplemental Figure 2a-b**). Subneutralizing concentrations of VIR-7831 and VIR-7832 were

170 precomplexed with SARS-CoV-2 (MOI =0.01) and added to target cells. Using immunostaining methods,  
171 at 24 hours post-infection no productive entry of SARS-CoV-2 into moDCs, PBMCs, or U937 cells was  
172 observed in the presence or absence of either mAb, while VeroE6 control cells demonstrated  
173 internalization in all conditions evaluated. Reduced internalization of SARS-CoV-2 in VeroE6 cells was  
174 observed at the highest concentration of VIR-7831 and VIR-7832 (p-value <0.05), indicating effective  
175 virus neutralization prevented virus entry. Using a focus forming assay, virus replication and secretion of  
176 infectious virus were detectable by 48 hours post-infection in VeroE6 cells, with comparable levels of  
177 replication in the presence or absence of VIR-7831 or VIR-7832. However, no replication of SARS-CoV-  
178 2 was detected in moDCs, PBMCs or U937 cells regardless of antibody treatment, indicating lack of  
179 productive SARS-CoV-2 infection of these cells, consistent with previously published data<sup>43</sup>.

180 To evaluate the potential for VIR-7831 and VIR-7832 to enhance cytokine release upon SARS-CoV-2  
181 infection in FcγR-expressing cells, cytokines and chemokines were measured in the supernatants from  
182 cells infected with SARS-CoV-2-in the presence of VIR-7831 or VIR-7832 (**Supplemental figure 2c**).  
183 Levels of IFN-γ, IL-10, IL-6, IL 8, IP-10, MCP-1, and TNF-α in the supernatant were quantified by MSD  
184 at 24- and 48-hours post-infection. For all cell types evaluated, cytokine/chemokine production was  
185 similar between all antibody concentrations tested and the no antibody control at both 24- and 48-hours  
186 post-infection. Taken together, these in vitro data indicate that neither VIR-7831 nor VIR-7832 exhibit in  
187 vitro activities that have been proposed to possibly correlate with ADE in vivo.

188 **VIR-7831 and VIR-7832 have a high barrier to resistance in vitro and do not display cross-**  
189 **resistance with other SARS-CoV-2 mAbs.** We next determined whether resistant variants could be  
190 elicited by serial passage of SARS-CoV-2 in the presence of VIR-7832. As VIR-7831 and VIR-7832  
191 differ only in the Fc region of the antibody, resistance selection experiments were conducted with VIR-  
192 7832 as a proxy for both antibodies. SARS-CoV-2 was subjected to 10 passages in the presence of VIR-  
193 7832 at fixed concentrations of ~10x, 20x, 50x or 100x IC<sub>50</sub> (1, 2, 5, or 10 μg/mL) in VeroE6 cells. No  
194 CPE was detected in wells passaged with antibody through 10 passages, while CPE was observed in the



195 no antibody control in all passages. Similarly, no virus was detected by focus forming assay at any  
196 concentration of VIR-7832 through all 10 passages even at the lowest concentration tested.

197 As no viral breakthrough was observed in the fixed concentration resistance selection, a second method  
198 was employed wherein SARS-CoV-2 virus was passaged in sub-IC<sub>50</sub> concentrations of antibody followed  
199 by subsequent passaging in the presence of increasing concentrations of mAb in an attempt to force  
200 resistance emergence (**Supplemental Figure 3**). Passaging was performed in duplicate wells to account  
201 for founder effects, and concentration increases for each well were based on CPE observations. Five  
202 sequential passages were conducted using increasing concentrations of VIR-7832 at 0.5, 1, 2, 5 and ~10x  
203 IC<sub>50</sub> (0.05, 0.1, 0.2, 0.5, 1 µg/mL; **Supplemental Figure 3a**), though no CPE was observed by passages 4  
204 and 5 (0.5 and 1 µg/mL, respectively) indicating that variants originally selected at the lower  
205 concentrations were either unfit or susceptible to the higher concentrations of antibody. To further assess  
206 whether resistance mutations could be generated, selection was restarted using passage 3 virus generated  
207 with ~2x IC<sub>50</sub> (0.2 µg/mL) of VIR-7832 in duplicate wells at ~2x and ~5x IC<sub>50</sub> (0.2, 0.5 µg/mL),  
208 generating two passage lineages (**Supplemental Figure 3b-c**).

209 Supernatants were evaluated for detectable virus at each passage by focus forming assay and cell  
210 supernatants from viral passages containing detectable virus were tested in SARS-CoV-2 neutralization  
211 assays to evaluate IC<sub>50</sub> shifts as a marker of reduced susceptibility (**Supplemental Table 1**). With the  
212 exception of passage 8, modest fold changes were observed, with shifts in IC<sub>50</sub> values ranging from 5.4-  
213 to 6.5-fold compared to the wild-type SARS-CoV-2 stock virus. In lineage 1, the passage 8 virus  
214 displayed a >10-fold shift in IC<sub>50</sub> (greater than highest concentration tested). Sequence analysis detected  
215 an identical 4 amino acid insertion in the N-terminal domain (215-216insKLRS) and 5 amino acid  
216 deletion in correspondence of the furin cleavage site (675-679del) in both lineages at all passages  
217 sequenced, as well as the amino acid substitution E340A in lineage 1, and R682W, and V1128F in  
218 lineage 2. The deletion at amino acids 675-679 has been previously described during passaging of SARS-  
219 CoV-2 in tissue culture suggesting enrichment to be a result of cell culture adaptation<sup>44</sup> while the 215-

220 216insKLRS was detected in the input virus. Neither 215-216insKLRS nor R682W variants were highly  
221 enriched with passaging (**Supplemental Table 1**) and enrichment of 675-679del and V1128F did not  
222 profoundly alter the VIR-7832 IC<sub>50</sub>. However, appearance of the E340A variant at 98.7% did correlate  
223 with a >10-fold shift in IC<sub>50</sub> suggesting this variant may confer resistance.

224 To evaluate whether amino acid variants identified in the resistance selection conferred reduced  
225 susceptibility to VIR-7831 and VIR-7832, neutralization of pseudotyped viruses encoding the S variants  
226 was assessed (**Supplemental Table 2**). VIR-7831 and VIR-7832 neutralized R682W and V1128F SARS-  
227 CoV-2 pseudotyped virus spike variants with IC<sub>50</sub> values similar to wild type (< 2-fold change in IC<sub>50</sub>)  
228 indicating that these variants do not alter susceptibility. In contrast, E340A conferred reduced  
229 susceptibility to VIR-7831 and VIR-7832 (> 100-fold change in IC<sub>50</sub>) indicating that E340A is a VIR-  
230 7831/VIR-7832 monoclonal antibody resistance mutation (MARM).

231 As VIR-7831/VIR-7832 demonstrated a unique in vitro resistance profile, we investigated the potential  
232 for cross-resistance to MARMs that confer reduced susceptibility to the authorized monoclonal antibodies  
233 bamlanivimab, imdevimab and casirivimab<sup>10,11,45-47</sup> using pseudotyped virus. Notably, some of these  
234 mutations are found in highly prevalent variants of concern<sup>17,30,48</sup>. VIR-7831 effectively neutralized  
235 pseudotyped viruses expressing spike MARMs that alter bamlanivimab, casirivimab and/or imdevimab  
236 activity (**Table 3**). Fold changes in IC<sub>50</sub> values compared to wild-type were <3-fold for 18/19 variants  
237 tested. A modest 3.4-fold shift in the VIR-7831 IC<sub>50</sub> was observed for the V445A variant that confers  
238 reduced susceptibility to imdevimab. These data indicate that VIR-7831/VIR-7832 does not display cross-  
239 resistance with currently authorized mAbs and supports the potential combination use of VIR-7831/VIR-  
240 7832 with other mAb therapeutics.

241 **The VIR-7831/VIR-7832 epitope is highly conserved among SARS-CoV-2 sequences.** The parental  
242 antibody of VIR-7831 and VIR-7832 (S309) binds to a highly conserved sarbecovirus epitope that is  
243 potentially intolerant of variation. To investigate the current state of epitope conservation, >1,000,000  
244 spike sequences from SARS-CoV-2 deposited in the GISAID database as of April 16, 2021 were

245 examined for epitope variation. More than 99.9% conservation is seen for those amino acids comprising  
246 the epitope among currently available sequences for all positions including 17/23 amino acid positions  
247 that were  $\geq 99.99$  conserved (**Table 4**).

248 VIR-7831 activity against viral mutants carrying single substitutions in the epitope was assessed in  
249 pseudotyped virus assays. VIR-7831 effectively neutralized epitope variants at most amino acid positions  
250 tested (**Table 5**). Variants at two positions, E340 and P337, resulted in significant IC<sub>50</sub> shifts indicating  
251 reduced susceptibility to VIR-7831. Moderate shifts in potency were observed for P337H and P337T  
252 variants (7.50- and 5.38-fold, respective) while more significant shifts in potency were observed for  
253 P337L/R and E340A/K/G (27-fold to >276-fold). Notably, these variants are detected in a low number of  
254 sequences and do not have a pattern that suggest emergence in the GISAID database (45 and 63 variant  
255 counts out of >1,000,000 sequences for P337 and E340, respectively). This observation is consistent with  
256 the possibility that variations at these positions come with a fitness cost to the virus.

257 **VIR-7831 reduces weight loss, total viral load and infectious virus levels in a hamster model of**  
258 **SARS-CoV-2 infection.** To evaluate the efficacy of VIR-7831 in vivo, the hamster model was utilized.  
259 As it was unknown what effect the LS mutation would have in the hamster, a non-LS version of VIR-  
260 7831 (SGHmAb-no-LS) was used for these experiments. Hamsters were administered SGHmAb-no-LS  
261 intraperitoneally at Day -1 (30, 5, 0.5 or 0.05 mg/kg) or Day -2 (15, 5, 0.5 or 0.05 mg/kg) prior to  
262 intranasal SARS-CoV-2 inoculation (**Figure 3a**). Using body weight as a marker of degree of clinical  
263 disease, doses of  $\geq 5$ mg/kg resulted in significantly reduced weight loss at Day 4 compared to controls.  
264 (**Figure 3b-e**). Significant decreases in lung viral load were also observed at  $\geq 5$ mg/kg as measured by  
265 RT-qPCR (**Figures f-g**). Day 4 TCID<sub>50</sub> measurements indicated that antibody administered at  $\geq 0.5$  mg/kg  
266 resulted in significantly lower levels of infectious virus in lung tissue compared to controls (**Figure 3h-i**).  
267 Notably, across these experiments, no enhancement of disease was observed in animals receiving  
268 SGHmAb-no-LS based on changes in weight, viral RNA in the lungs, or TCID<sub>50</sub> infectious virus levels.

269 Collectively, these data indicate that VIR-7831 prevented in a dose-dependent fashion virus replication  
270 and morbidity in SARS-CoV-2 challenged hamsters without signs of ADE at any dose tested.

## 271 **DISCUSSION**

272 Here we show the in vitro and in vivo preclinical characterization of VIR-7831 and VIR-7832, two  
273 monoclonal antibodies being advanced into clinical studies<sup>49–51</sup>. Both antibodies demonstrate high-affinity  
274 binding to S in vitro, including on the surface of cells, and effectively neutralize wildtype SARS-CoV-2  
275 in a live virus assay. VIR-7831 and VIR-7832 retain activity against the UK B.1.1.7, South Africa  
276 B.1.351 and Brazil P.1 variants in an authentic virus system, consistent with data using pseudotyped  
277 viruses. VIR-7831 bind C1q, activate FcγRs and demonstrate ADCC and ADCP in vitro. Experiments in  
278 the hamster model of SARS-CoV-2 infection show proof-of-concept efficacy in vivo. Notably, in vitro  
279 and in vivo data did not provide any supporting evidence that these antibodies would demonstrate ADE in  
280 a clinical setting.

281 That VIR-7831 and VIR-7832 retain activity against spike variants in authentic virus and pseudotyped  
282 virus assays is a key finding at this stage of the pandemic. With the increased transmissibility and  
283 potential for more severe disease observed with these viruses, the availability of therapeutic or  
284 prophylactic mAbs that remains active against these variants is essential. Current in vitro data indicate  
285 that the E484K variant found in both B.1.351, P.1 and other emerging independent lineages, and also  
286 recently found in combination with B.1.1.7<sup>52</sup>, confers reduced susceptibility to multiple currently  
287 authorized monoclonal antibodies possibly lessening the utility of these antibodies or, worse, rendering  
288 them ineffective. In addition to retaining activity against key variants of concern, in pseudotyped virus  
289 experiments VIR-7831 showed no significant cross-resistance with variants that reduce the activity of  
290 authorized mAbs. These data additionally demonstrate the uniqueness of VIR-7831 and VIR-7832 and  
291 further highlight the utility VIR-7831 and VIR-7832 could have, alone or in combination, as clinical  
292 agents.

293 Notably, even over a year into the pandemic, the VIR-7831/VIR-7832 epitope remains highly conserved  
294 among available sequences of circulating virus with  $\geq 99.9\%$  conservation of epitope amino acids. This is  
295 consistent with the value of the strategy used for isolation of monoclonal antibodies that neutralize both  
296 SARS-CoV and SARS-CoV-2 based on the idea that these two virulent human viruses are  
297 phylogenetically divergent within the sarbecovirus subgenus. Furthermore, MARMs identified at  
298 positions P337 and E340 are present at very low levels among current sequences. That amino acids P337  
299 and E340 remain  $\geq 99.99\%$  conserved at this stage of the pandemic indicates that variants at these  
300 positions may confer disadvantageous effects on the virus, consistent with the conservation of this epitope  
301 across the sarbecovirus family<sup>21</sup>.

302 Viral variants of concern for RBM-targeting mAbs are quickly spreading<sup>53</sup>. The vaccines presently being  
303 deployed around the world generate high-titer neutralizing antibodies that target the S protein RBM.  
304 Importantly, the RBM is highly immunodominant for responses to natural infection<sup>54</sup>. Vaccine-induced  
305 and convalescent immunity may therefore potentially put further mutational pressure on the RBM  
306 sequence to evade such antibody responses. In contrast, antibody responses overlapping with the VIR-  
307 7831/VIR-7832 epitope are limited after infection<sup>54</sup>, possibly because of the shielding effect of the highly  
308 conserved N343 glycan. In this regard the epitope may face less vaccine- or infection-generated immune  
309 pressure, potentially preserving this conserved epitope long-term.

310 Recent data have indicated that the cells used to generate live virus stocks and overexpression of  
311 ACE2/TMPRSS2 in target cells used for assays can affect mAb activity in vitro<sup>29,55</sup>. The VIR-7831/VIR-  
312 7832 parental antibody S309 seems particularly sensitive to in vitro methods using ACE2 overexpressing  
313 cells<sup>55</sup>. It is therefore notable that VIR-7831 displays significant efficacy in an in vivo proof-of-concept  
314 SARS-CoV-2 infection experiment using hamsters despite the fact that patterns of engagement of hamster  
315 FcRs by human IgG1 antibodies may not reflect patterns of human IgG1 antibodies with their cognate  
316 human FcRs. These findings argue that in vitro data derived from such ACE2 and/or TMPRSS2  
317 overexpression cell lines do not accurately reflect the in vivo antiviral capacity of tested mAbs.

318 Furthermore, that the significant *in vivo* effects of VIR-7831 in the hamster model likely occurred in the  
319 absence of full effector functions due to species-specific interactions between antibodies and FcRs, argues  
320 that effects in COVID-19 patients incorporating both the neutralization capacity of the antibody plus the  
321 ability to harness the strength of the immune system could lead to positive clinical outcomes.

322 The clinical potential of VIR-7832, with the inclusion of the GAALIE Fc mutation, is of special interest  
323 in the context of SARS-CoV-2 infection. Previously published data by the Ravetch laboratory comparing  
324 the *in vivo* efficacy of a hemagglutinin-targeting mAb with and without inclusion of the GAALIE  
325 mutation in a transgenic humanized Fc $\gamma$ R mouse model of influenza infection demonstrated superior  
326 efficacy of the GAALIE-containing antibody in both therapeutic and prophylactic experiments<sup>26</sup>. These  
327 effects were mediated by protective CD8<sup>+</sup> T cell responses elicited by the GAALIE antibody. Clinical  
328 data examining the contribution of the adaptive immune response in SARS-CoV-2 infection indicate that  
329 poor T cell induction correlates with severe disease (reviewed in <sup>56</sup>). Thus, the potential for VIR-7832 to  
330 augment the T cell response to SARS-CoV-2 infection could conceivably play a crucial role in limiting  
331 progression to severe COVID-19 disease or in treatment of severe established disease. This latter  
332 possibility is supported by recent publications showing that monoclonal antibodies with effector functions  
333 are especially effective in the therapeutic setting via recruitment of tissue-protective monocyte functions  
334 <sup>19</sup>, and that potency of antibodies in the pre-clinical mouse model does not correlate with *in vitro*  
335 neutralizing activity of antibodies<sup>18</sup>.

336 Taken together, these data indicate that VIR-7831 and VIR-7832 could play a powerful role in the fight  
337 against COVID-19 through the dual action of broadly neutralizing activity paired with engagement of the  
338 immune system through effector function capabilities.

339

340

341

342 **METHODS**

343 **Cells.** Vero E6 cells (ATCC) and Lenti-X 293T cells (Takara) were cultured in Dulbecco's Modified  
344 Eagle's medium (DMEM), 10% FBS, 1x Penicillin-Streptomycin at 37°C, 5% CO<sub>2</sub>.

345 **Monoclonal Antibodies.** VIR-7831 and VIR-7832 were produced at WuXi Biologics (China). SGHmAb-  
346 no-LS, S309-LS, and S309-GRLR were produced at Humabs Biomed SA, a subsidiary of Vir  
347 Biotechnology (Bellinzona, Switzerland) in expiCHO cells transiently co-transfected with plasmids  
348 expressing the heavy and light chain, as previously described <sup>57</sup>.

349 **Virus.** SARS-CoV-2 isolates USA-WA1/2020, UK/VUI/3/2020, hCoV-19/South Africa/KRISP-  
350 K005325/2020 and hCoV-19/Japan/TY7-503/2021 were obtained from BEI Resources. To propagate  
351 SARS-CoV-2, VeroE6 or VeroE6-TMPRSS2 cells were seeded at 10X10<sup>6</sup> cells in T175 flasks in growth  
352 media and infected the next day at a MOI of 0.001 in virus propagation media. Virus was adsorbed for 1  
353 hour at 37°C. Virus inoculum was removed, flasks were washed once with PBS, 25 mL of infection  
354 media was added to the cells and flasks were incubated at 37°C. Supernatants were collected at 48 hours  
355 post-infection once cytopathic effect was visible, centrifuged at 500 x g for 5 minutes, followed by a  
356 second centrifugation at 1000 x g for 5 minutes. Clarified supernatants were then aliquoted and stored at -  
357 80°C. Virus titers were determined using a plaque assay on VeroE6 cells, using standard methods.  
358 Briefly, 10-fold dilutions of virus stock were incubated in 6 well plates with 2.4% colloidal cellulose  
359 overlay for 24 hours. Cells were fixed with 4% PFA for 30 minutes at room temperature (RT),  
360 permeabilized with 0.125% Triton X-100, stained with anti-SARS-CoV-2 nucleocapsid antibody at  
361 1:5000 and goat anti-rabbit IgG HRP at 1:5000. Plaque forming units (PFU) were visualized with  
362 TrueBlue reagent.

363 **In vitro binding ELISA.** For the ELISA assay, 96-well plates were coated with 100 µl/well recombinant  
364 SARS-CoV2 RBD diluted in assay diluent (1% BSA/PBS) at a final concentration of 2 µg/mL and  
365 incubated overnight at 4°C. Plates were washed three times with 300 µl/well wash buffer using an



366 automated washer. Assay diluent (100  $\mu$ l/well) was added to block the plates and incubated for 1 hour at  
367 room temperature (RT) with shaking. Assay diluent was removed, and plates washed three times with  
368 wash buffer. Serial 1:3 dilutions of mAb (concentration range from 6  $\mu$ g/mL to 0.33 ng/mL) in assay  
369 diluent were dispensed at 100  $\mu$ l/well and incubated 1 hour at RT with shaking, then washed three times  
370 with wash buffer. The HRP-conjugated secondary antibody reagent (1:5,000 dilution in assay diluent)  
371 was added to each well (100  $\mu$ l/well) and incubated for 1 hour at RT with shaking. After three washes  
372 with wash buffer, 100  $\mu$ l/well of 2-component TMB peroxidase substrate solution was dispensed in each  
373 well and developed for 5 minutes at RT. The reaction was stopped with 100  $\mu$ L/well 1M H<sub>2</sub>SO<sub>4</sub> and the  
374 OD was read immediately at 450 nm on a SpectraMax M5 Microplate reader. EC<sub>50</sub> values were calculated  
375 using non-linear regression of log (agonist) versus response in Graph Pad Prism.

376 **Spike binding affinity quantification by SPR.** Antibody was diluted to 2  $\mu$ g/mL (1 mL) in HBS-EP+  
377 buffer and injected at 10  $\mu$ L/min for 30 seconds across one flow cell of a CM5 sensor chip immobilized  
378 with anti-human Fc antibody docked in a Biacore T200. SARS-CoV2-RBD diluted in HBS-EP+ buffer  
379 was then injected at a single concentration, 1:3 dilutions from 100 nM to 3.7 nM, across both the flow cell  
380 containing captured the antibody as well as a reference flow cell containing only anti-human Fc antibody.  
381 Binding was measured with a flow rate of 30  $\mu$ L/min and an injection time of 600 seconds; dissociation  
382 was monitored for 1800 seconds after injection. Data were collected at 10 Hz. After each binding  
383 measurement, regeneration reagent was injected to prepare the surface for a new cycle. Experiments were  
384 performed at 25°C, with the samples held at 15 °C in the instrument prior to injection.

385 **Measurement of Binding to Human Fc $\gamma$  Receptors by SPR.** Binding of VIR-7831 and VIR-7832 to  
386 human recombinant Fc $\gamma$ Rs was measured by surface plasmon resonance (SPR) on a Biacore T200.  
387 Briefly, Biotin CAPture Reagent (modified streptavidin) was injected across all flow cells of a CAP  
388 sensor chip docked in a Biacore T200. Biotinylated Fc receptors at 1  $\mu$ g/mL were injected across a single  
389 flow cell at 10  $\mu$ L/min for 60 seconds (one receptor per flow cell), with one flow cell reserved as a  
390 reference surface. VIR 7831 or VIR-7832 at 100  $\mu$ g/mL (diluted in HBS-EP+) were injected across all



391 flow cells for 200 seconds using a flow rate of 30  $\mu\text{L}/\text{min}$  and association was monitored. Dissociation  
392 was monitored for another 200 seconds after injection. Data was collected at 10 Hz. After each binding  
393 measurement, CAP Regeneration reagent was injected to prepare the surface for a new cycle.  
394 Experiments were performed at 25°C, with the samples held at 15°C in the instrument prior to injection.

395 **Measurement of Binding to Human Complement Protein C1q.** Binding of VIR-7831 and VIR-7832 to  
396 human complement was measured by biolayer interferometry (BLI) using an Octet Red96 instrument  
397 (FortéBio). Briefly, anti-human Fab (CH1-specific) sensors were used to capture VIR-7831 and VIR-  
398 7832 at 10  $\mu\text{g}/\text{ml}$  for 10 minutes. The IgG-loaded sensors were then exposed to kinetics buffer containing  
399 3  $\mu\text{g}/\text{ml}$  of purified human C1q for 4 minutes, followed by a dissociation step in the same buffer for  
400 additional 4 minutes. Association and dissociation profiles were measured in real time as changes in the  
401 interference pattern.

402 **Binding to Cell Surface Expressed SARS-CoV-2 Spike Protein.** The SARS-CoV-2 spike protein  
403 coding sequence (YP\_009724390.1, Wuhan-Hu-1 strain) was cloned into a cell expression plasmid under  
404 the control of the human CMV promoter (pCMV1) to generate pCMV1 WT spike. ExpiCHO-S cells  
405 were seeded the day before transfection at  $3 \times 10^6$  cells/mL in ExpiCHO Expression Medium.  
406 Immediately before transfection, the cells were seeded at  $6 \times 10^6$  cells cells/mL in a volume of 15 mL in  
407 125 mL shake flasks. Six  $\mu\text{g}$  of pCMV1 WT spike plasmid or vector control were diluted in 1.2 mL of  
408 iced OptiPRO SFM., followed by addition of 48  $\mu\text{L}$  of ExpiFectamine CHO Reagent and complexing for  
409 1 minute at RT. The transfection mixture was added dropwise to cells with gentle swirling. Cells were  
410 then incubated at 37°C, 8% CO<sub>2</sub> with shaking for 42 hours. At 42 hours post-transfection, ExpiCHO-S  
411 cells were harvested, washed twice with FACS buffer and resuspended at a concentration of  $1.0 \times 10^6$   
412 cell/mL in PBS. Cells ( $5 \times 10^4$  cells in 50  $\mu\text{l}$ /wells) were dispensed into a 96-well V-bottom plate.  
413 Antibody was serially diluted (1:4, 10 points) starting at a concentration of 10  $\mu\text{g}/\text{mL}$ . Cells were pelleted  
414 at 300 x g for 5 minutes and resuspended in 50  $\mu\text{L}$ /well of antibody serial dilutions and plates were  
415 incubated for 45 mins on ice. Cells were washed twice in FACS buffer. Alexa Fluor 647-labelled Goat

416 Anti-Human IgG secondary Ab was diluted 1:750 in FACS buffer and 50  $\mu$ L was added to the cell pellet  
417 for 15 min on ice. Cells were washed twice with FACS buffer, resuspended in 1% PFA. Data was  
418 acquired by flow cytometry (CytoFlex LX).

419 **Pseudotyped virus production.** Lenti-X<sup>TM</sup> 293T cells were seeded in 10-cm dishes for 80% next day  
420 confluency. The next day, cells were transfected with the plasmid pcDNA3.1(+)-spike-D19 (encoding the  
421 SARS-CoV-2 spike protein) or pcDNA3.1(+)-spike-D19 variants using the transfection reagent TransIT-  
422 Lenti according to the manufacturer's instructions. One day post-transfection, cells were infected with  
423 VSV-luc (rVSV $\Delta$ G; Kerafast) at an MOI of 3. The cell supernatant containing SARS-CoV-2 pseudotyped  
424 virus was collected at day 2 post-transfection, centrifuged at 1000 x g for 5 minutes to remove cellular  
425 debris, aliquoted and frozen at -80°C.

426 **In Vitro Neutralization of SARS-CoV-2 Pseudotyped Virus.** VeroE6 cells were seeded into flat  
427 bottom tissue culture 96-well plates at 20,000 cells/well and cultured overnight at 37°C. Twenty-four  
428 hours later, 9-point 1:4 serial dilutions of VIR-7831 were prepared in infection medium and each dilution  
429 was tested in triplicate per plate (range: 20,000 to 0.3 ng/mL final concentration). SARS-CoV-2 virus  
430 stock was diluted in infection media for a final concentration of 2000 plaque forming units per well (MOI  
431 0.1). Antibody dilutions were added to virus and incubated for 30 minutes at 37°C. Media was removed  
432 from the VeroE6 cells, mAb-virus complexes were added, and cells were incubated at 37°C. At 6 hours  
433 post-infection, cells were fixed with 250  $\mu$ L 4% PFA, incubated for 30 minutes at RT, then washed 3  
434 times with PBS to remove residual PFA. The cells were permeabilized with 50  $\mu$ L of 0.125% Triton X-  
435 100 in PBS for 30 minutes at RT. The blocking buffer was removed, 50  $\mu$ L of SARS-CoV-2 nucleocapsid  
436 antibody at 1:2,000 in blocking buffer was added, and plate was incubated for 1 hour at RT. Plates were  
437 washed three times with PBS and then incubated for 1 hour at RT with 50  $\mu$ L/well of goat anti-rabbit-  
438 Alexa647 secondary antibody at a final dilution of 1:1,000 mixed with 2  $\mu$ g/mL Hoechst dye in blocking  
439 buffer. After washing 5 times with PBS, 100  $\mu$ L of fresh PBS was added for imaging. Plates were imaged

440 on a Cytation5 plate reader. Whole well images were acquired (12 images at 4X magnification per well)  
441 and nucleocapsid-positive cells were counted using the manufacturer's software.

442 **Live virus neutralization.** VeroE6 cells were seeded into flat bottom tissue culture 96-well plates at  
443 20,000 cells/well and cultured overnight at 37°C. Twenty-four hours later, 9-point 1:4 serial dilutions of  
444 VIR-7831 were prepared in infection medium and each dilution was tested in triplicate per plate (range:  
445 20,000 to 0.3 ng/mL final concentration). SARS-CoV-2 virus stock was diluted in infection media for a  
446 final concentration of 2000 plaque forming units per well (MOI 0.1). Antibody dilutions were added to  
447 virus and incubated for 30 minutes at 37°C. Media was removed from the VeroE6 cells, mAb-virus  
448 complexes were added, and cells were incubated at 37°C. At 6 hours post-infection, cells were fixed with  
449 250 µL 4% PFA, incubated for 30 minutes at RT, then washed 3 times with PBS to remove residual PFA.  
450 The cells were permeabilized with 50 µL of 0.125% Triton X-100 in PBS for 30 minutes at RT. The  
451 blocking buffer was removed, 50 µL of SARS-CoV-2 nucleocapsid antibody at 1:2,000 in blocking buffer  
452 was added, and plate was incubated for 1 hour at RT. Plates were washed three times with PBS and then  
453 incubated for 1 hour at RT with 50 µL/well of goat anti-rabbit-Alexa647 secondary antibody at a final  
454 dilution of 1:1,000 mixed with 2 µg/mL Hoechst dye in blocking buffer. After washing 5 times with PBS,  
455 100 µL of fresh PBS was added for imaging. Plates were imaged on a Cytation5 plate reader. Whole well  
456 images were acquired (12 images at 4X magnification per well) and nucleocapsid-positive cells were  
457 counted using the manufacturer's software..

458 **Determination of Viral Titer by Focus-Forming Assay.** One day prior to infection,  $1.2 \times 10^4$  VeroE6  
459 cells were plated in black-walled, clear bottomed 96-well plates. Virus samples were diluted 1:5 in  
460 infection media and adsorbed onto VeroE6 cells for one hour at 37°C. The cells were washed once and  
461 overlaid with 1% methylcellulose/serum-containing media. At 24 hours post-infection, the  
462 methylcellulose overlay was removed, and cells were washed with PBS. Cells were fixed with 4% PFA,  
463 incubated for 30 minutes at RT, then washed with PBS to remove residual PFA. The cells were  
464 permeabilized with 50 µL of 0.25% Triton X-100 in PBS for 30 minutes at RT. The Triton X-100 was

465 removed, cells were washed twice with PBS, and incubated with 50  $\mu$ L of SARS-CoV-2 nucleocapsid  
466 antibody at 1:2,000 in blocking buffer for one hour at RT. Plates were washed three times with PBS and  
467 then incubated for one hour at RT with 50  $\mu$ L/well of goat anti-rabbit-Alexa647 secondary antibody at  
468 1:1,000 in blocking buffer. After washing three times with PBS, 50  $\mu$ L of Hoechst dye at 1:1,000 in PBS  
469 was added for imaging. Plates were imaged on a Cytation5 plate reader. Whole well images were  
470 acquired (12 images at 4X magnification per well) and nucleocapsid-positive foci were counted using the  
471 manufacturer's software and used to determine focus-forming units/mL supernatant (FFU/mL).

472 **Determination of mAb-Dependent Activation of Human Fc $\gamma$ RIIa, Fc $\gamma$ RIIIa or Fc $\gamma$ RIIb.** VIR-7831,  
473 VIR-7832, S309-LS, and a control mAb with abrogated Fc $\gamma$ R binding, S309-GRLR, were serially diluted  
474 6-fold in assay buffer from 10,000 ng/ml to 0.006 ng/ml. Nine-point serial dilutions of mAbs were  
475 incubated with 12,500 (for Fc $\gamma$ RIIIa and Fc $\gamma$ RIIb) or 10,000 (for Fc $\gamma$ RIIa) CHO-CoV-2-Spike cells per  
476 96-plate well in a white, flat-bottom plate for 15 minutes at room temperature. Jurkat effector cells  
477 expressing indicated Fc $\gamma$ Rs and stably transfected with an NFAT-driven luciferase gene were thawed,  
478 diluted in assay buffer, and added to the plate at an effector to target cell ratio of 6:1 for Fc $\gamma$ RIIIa and  
479 Fc $\gamma$ RIIb or 5:1 for Fc $\gamma$ RIIa. Control wells were also included that were used to measure antibody-  
480 independent activation (containing target cells and effector cells but no antibody) and background  
481 luminescence of the plate (wells containing assay buffer only). Plates were incubated for 18 hours at 37°C  
482 with 5% CO<sub>2</sub>. Activation of human Fc $\gamma$ Rs in this bioassay results in the NFAT-mediated expression of  
483 the luciferase reporter gene. Luminescence was measured with a luminometer after adding the Bio  
484 GloTM Luciferase Assay Reagent according to the manufacturer's instructions. To control for  
485 background, the mean of the relative luminescence units (RLU) values in wells containing only Assay  
486 Buffer was calculated and subtracted from all data points. Data were expressed as the average of RLU  
487 over the background

488 **Determination of NK-Cell Mediated Antibody-Dependent Cellular Cytotoxicity.** Primary NK cell  
489 activation was tested using freshly isolated cells from two previously genotyped donors expressing

490 homozygous low affinity (F158) or high affinity (V158) FcγRIIIa. Serial dilutions of mAbs (serially  
491 diluted 10-fold in AIM-V Medium from 40,000 ng/ml to 0.075 ng/ml) were incubated with 7,500 CHO-  
492 CoV-2 Spike cells per well of a 96 well round-bottom plate for 10 minutes. Target cell and antibody  
493 mixtures were then incubated with primary human NK cells as effectors at an effector-to-target ratio of  
494 10:1. ADCC was measured using lactate dehydrogenase (LDH) release as a readout according to the  
495 manufacturer's instructions (Cytotoxicity Detection Kit (LDH), Roche) after 4 hours of incubation at  
496 37°C. In brief, plates were centrifuged for 4 minutes at 400 x g, and 35 µl of supernatant was transferred  
497 to a flat 384 well plate. LDH reagent was prepared and 35 µl were added to each well. Using a kinetic  
498 protocol, the absorbance at 490 nm and 650 nm was measured once every 2 minutes for 8 minutes, and  
499 the slope of the kinetics curve was used as result. The percent specific lysis was determined by applying  
500 the following formula: (specific release – spontaneous release) / (maximum release - spontaneous release)  
501 x 100.

502 **Determination of Monocyte-Mediated Antibody-Dependent Cellular Phagocytosis.** ADCP assays  
503 were performed using human PBMCs freshly isolated from whole blood. CHO CoV-2-Spike cells were  
504 used as target cells and were fluorescently labeled with PKH67 Fluorescent Cell Linker Kit (Sigma  
505 Aldrich) prior to incubation with mAbs, according to manufacturer's instructions. Serial dilutions of  
506 mAbs (serially diluted 5-fold from 5,000 ng/ml to 0.32 ng/ml in RPMI-1640 + L-glutamine supplemented  
507 with 10% Hyclone FBS + 2x anti-anti (antibiotic-antimycotic)) were incubated with 10,000 CHO-CoV-2-  
508 Spike cells per well of a 96 well polypropylene plate for 10 minutes. Primary PBMCs were fluorescently  
509 labeled with Cell Trace Violet according to the manufacturer's instructions. Target cell and antibody  
510 mixtures were then incubated with labeled PBMCs at an effector-to-target ratio of 16:1. After an  
511 overnight incubation at 37°C, monocytes were stained with anti-human CD14-APC antibody (BD  
512 Pharmingen). Antibody-mediated phagocytosis was determined by flow cytometry, gating on CD14+  
513 cells that were double positive for cell trace violet and PKH67. Raw data were exported from the flow  
514 cytometer into the flow cytometry analysis software FlowJo v10 (Becton Dickinson) for gating and

515 determination of the percentage of CD14<sup>+</sup> cells that were also double positive for cell trace violet and  
516 PKH67. Cells expressing only cell trace violet or only PKH67 were used to set the positive staining gates.

517 **In vitro resistance selection.** The selection of variants in the presence of increasing concentrations of  
518 VIR-7832 was conducted in VeroE6 cells. The day before infection,  $6 \times 10^4$  VeroE6 cells were seeded in  
519 24 well plates and incubated overnight at 37°C. The next day, 600 focus forming units (FFU) of SARS-  
520 CoV-2 virus (MOI = 0.01) was incubated with 0.5X IC<sub>50</sub> of VIR-7832 (0.05 µg/mL) at 37°C for one hour  
521 in infection media. The mAb-virus complexes were adsorbed on VeroE6 cells for one hour at 37°C in  
522 duplicate wells. After adsorption, cells were washed with DMEM and overlaid with infection media  
523 containing 0.05 µg/mL VIR-7832. Control wells infected without antibody were included with each  
524 passage. Infected cells were monitored visually for CPE daily. In general, when infected cells exhibited ≥  
525 50% CPE, the culture supernatants were harvested, diluted 1:200, and added to fresh VeroE6 cells in 24-  
526 well plates with equivalent or increasing concentrations of VIR-7832. At each passage, supernatant was  
527 aliquoted and frozen at -80°C for titer and neutralization analyses.

528 **In vitro assessment of potential for ADE.** VeroE6 cells were plated at  $1.25 \times 10^4$  cells/well one day prior  
529 to infection. For each independent experiment, moDCs and PBMCs from five unique moDC donors and  
530 six unique PBMC donors were used, with three unique donors used for each independent experiment.  
531 Cryopreserved monocytes from unique donors were differentiated into moDCs for six days using human  
532 moDC differentiation media according to the manufacturer's protocol. Cryopreserved PBMCs from  
533 unique donors are thawed in the presence 0.3 mg/mL DNase and cultured in media for one day prior to  
534 infection. On the day of infection, moDCs, PBMCs, and U937 cells were counted and plated at  $7.5 \times 10^4$   
535 cells/well.

536 To examine viral entry, 24 hours post-infection, cells were fixed with 4% PFA, incubated for 30 minutes  
537 at RT, then washed with PBS to remove residual PFA. The cells were permeabilized with 50 µL of 0.25%  
538 Triton X-100 in PBS for 30 minutes at RT. The Triton X-100 was removed, cells were washed twice with  
539 PBS, and incubated with 50 µL of SARS-CoV-2 nucleocapsid antibody at 1:2,000 in blocking buffer for

540 one hour at RT. Plates were washed three times with PBS and then incubated for one hour at RT with 50  
541  $\mu\text{L}$ /well of goat anti-rabbit-Alexa647 secondary antibody at 1:1,000 in blocking buffer. After washing  
542 three times with PBS, 50  $\mu\text{L}$  of Hoechst dye at 1:1,000 in PBS was added for imaging. Plates were  
543 imaged on a Cytation5 plate reader. Whole well images were acquired (12 images at 4X magnification  
544 per well) and nucleocapsid-positive cells were counted using the manufacturer's software. The percent of  
545 nucleocapsid+ cells was quantified using the Gen5 Imager software (Biotek, Vermont) as number of  
546 Cy5+ cells, [(nucleocapsid+ cells)/number of Hoechst+ cells (total cells)]x100. Data was analyzed using  
547 Prism v8.00 (GraphPad Software, La Jolla California USA, [www.graphpad.com](http://www.graphpad.com)).

548 In order to quantify chemokines and cytokines from supernatants in a BSL2 laboratory, supernatants were  
549 inactivated by 10 minutes exposure to UVC light at 5,000  $\mu\text{J}/\text{cm}^2$ . Supernatants were diluted 1:5 in  
550 infection media and levels of cytokines/chemokines were quantified using the U-plex 96-well assay  
551 according to the manufacturer's protocol (Meso Scale Diagnostics, Rockville, MD). Quantification of  
552 cytokines and chemokines were determined based on an 8-point standard curve in duplicate, provided by  
553 the manufacturer. Cytokine data was analyzed using the Discovery Workbench v4.0.13 software (Meso  
554 Scale Diagnostics). Data was graphed and statistical analyses were conducted using Prism software.

555 **Sequencing of SARS-CoV-2 Spike Gene.** To isolate nucleic acid from the supernatant of viral passages,  
556 120  $\mu\text{L}$  of cell supernatant was added to 360  $\mu\text{L}$  of Trizol and stored at  $-80^\circ\text{C}$  for further analysis. Trizol  
557 collected samples from viral passages where a shift in neutralization  $> 2$ -fold relative to wild type was  
558 detected were subjected to RNA isolation using PureLink RNA Mini Kit with the incorporation of on-  
559 column PureLink DNase Treatment, following manufacturer's instructions. Reverse transcription  
560 reactions were performed with 6  $\mu\text{L}$  of purified RNA and oligoT primers using the NEB ProtoScript II  
561 First Strand cDNA Synthesis kit, according to manufacturer's instructions. The resulting cDNA was used  
562 as a template for PCR amplification of the spike gene using the KapaBiosystems polymerase (KAPA HiFi  
563 HotStart ReadyMix) with primers 5' aattatcttgcaaacacg-3' and 5' tgaggctgtatcggtatcg-3'.  
564 Amplification conditions included an initial 3 minutes at  $95^\circ\text{C}$ , followed by 28 cycles with 20 seconds at



565 98°C, 15 seconds at 62°C and 72°C for 2 minutes, with a final 4 minutes at 72°C. PCR products were  
566 purified using AMPure XP beads following manufacturer's instructions. The size of the amplicon was  
567 confirmed by analyzing 2 µL of PCR products using the Agilent D5000 ScreenTape System. Products  
568 were quantified by analyzing 1 µL with the Quant-iT dsDNA High-Sensitivity Assay Kit. Twenty ng of  
569 purified PCR product was used as input for library construction using the NEBNext Ultra II FS DNA  
570 Library Prep kit following manufacturer's instructions. DNA fragmentation was performed for 13  
571 minutes. NEBNext Multiplex Oligos for Illumina Dual Index Primer Set 1 was used for library  
572 construction, with a total of 6 PCR cycles. Libraries size was determined using the Agilent D1000  
573 ScreenTape System and quantified with the Quant iT dsDNA High-Sensitivity Assay Kit. Equal amounts  
574 of each library were pooled together for multiplexing and 'Protocol A: Standard Normalization Method'  
575 of the Illumina library preparation guide was used to prepare 8 pM final multiplexed libraries with 1%  
576 PhiX spike-in for sequencing. The MiSeq Reagent Kit v3 (600-cycle) was used for sequencing the  
577 libraries on the Illumina MiSeq platform, with 300 cycles for Read 1, 300 cycles for Read 2, 8 cycles for  
578 Index 1, and 8 cycles for Index 2.

579 **Bioinformatics Analysis of Conservation.** Available genome sequences for SARS-CoV-2 were  
580 downloaded from Global Initiative on Sharing All Influenza Data (GISAID; <https://www.gisaid.org/>) on  
581 April 16, 2021. Bat and pangolin sequences were removed to yield human-only sequences. The spike  
582 open reading frame was localized by aligning the reference protein sequence (NCBI reference sequence:  
583 YP\_009724390.1) to the genomic sequence of isolates with Exonerate v.2.4.0. Coding nucleotide  
584 sequences were translated in silico using seqkit v.0.12.0. Multiple sequence alignment was performed  
585 using MAFFT v.7.455. Variants were determined by comparison of aligned sequences to the reference  
586 sequence using the R v3.6.3/Bioconductor v.3.10 package Biostrings v.2.54.0.

587 **In vivo studies.** Syrian golden hamster studies were conducted at Lovelace Biomedical (Albuquerque,  
588 NM). Twelve- to sixteen-week-old male hamsters were interperitoneally administered a non-LS version  
589 of VIR-7831 (SGHmAb-no-LS), control antibody or diluent Day -1 or Day -2 prior to virus challenge.



590 Animals were inoculated intranasally at Day 0 with  $7.4 \times 10^4$  TCID<sub>50</sub> with SARS-CoV-2 (isolate USA-  
591 WA1/2020). Animals were also weighed once daily in the morning beginning on study Day -10 and  
592 continuing until the end of the study. Following euthanasia, RT-qPCR was performed on lung  
593 homogenates using quantitative real-time PCR methods targeting the SARS-CoV-2 N gene and the  
594 median tissue culture infections dose (TCID<sub>50</sub>) was determined per Lovelace internal methodology.

#### 595 **Author Contributions**

596 Conceived studies: A.L.C, C.H-D., F.A.P, D.M., M.S., L.S., A.T., L.A.P., S.H., G.S., H.W.V., D.C., C.M.H.  
597 Designed studies and experiments: A.L.C, C.H.D., F.A.P, D.M., M.S., M.L.A., E. D., B.G., J.D., L.R.,A.C., A.S.,  
598 R.S., J.W., N.C., E.C., S.L., C.C., D.P., C.S., J.N., A.P., A.W., L.S., A.T., L.A.P., S.H., G.S., H.W.V., D.C., C.M.H.  
599 Performed experiments: D.M., M.S., M.L.A., B.G., J.D., E.D., A.S., L.R., H.T., J.D., S.S., D.P., C.S., J.N., B.S.,  
600 S.B., J.W., J.Z., H.K., A.C., M.M-R., A.P., A.W., N.C., E.C. Analyzed and interpreted data: A.L.C., C.H-D., F.A.L.,  
601 D.M., M.S., M.L.A., B.G., J.D., D.P., C.S., J.N., E.L., A.S., R.S., L.R., H.T., B.S., S.B., J.W., J.Z., H.K., A.C., M. M-  
602 R., N.C., E.C., S.L., A.W., C.C., L.S., A.T., S.H., G.S., H.W.G, D.C., C.M.H. Prepared the manuscript with input  
603 from all authors: A.L.C., G.S., A.T., L.P., D.C., H.W.G., C.M.H.

#### 604 **Competing interests**

605 Some authors are current or former employees of Vir Biotechnology or Humabs BioMed SA (a fully-  
606 owned subsidiary of Vir Biotechnology) and may hold shares in Vir Biotechnology. H.W.V. is a founder of  
607 PierianDx and Casma Therapeutics.

608

609 **REFERENCES**

610

611 1. WHO Coronavirus Disease (COVID-19) Dashboard | WHO Coronavirus Disease (COVID-19)  
612 Dashboard. <https://covid19.who.int/>.

613 2. Levin, A. T. *et al.* Assessing the age specificity of infection fatality rates for COVID-19:  
614 systematic review, meta-analysis, and public policy implications. *Eur J Epidemiol* **35**, 1123–  
615 1138 (2020).

616 3. Dennis, A. *et al.* Multi-organ impairment in low-risk individuals with long COVID.  
617 doi:10.1101/2020.10.14.20212555.

618 4. Murphy, J. *et al.* Psychological characteristics associated with COVID-19 vaccine hesitancy  
619 and resistance in Ireland and the United Kingdom. *Nat Commun* **12**, 29 (2021).

620 5. Khubchandani, J. *et al.* COVID-19 Vaccination Hesitancy in the United States: A Rapid  
621 National Assessment. *J Commun Health* 1–8 (2021) doi:10.1007/s10900-020-00958-x.

622 6. Sallam, M. *et al.* High Rates of COVID-19 Vaccine Hesitancy and Its Association with  
623 Conspiracy Beliefs: A Study in Jordan and Kuwait among Other Arab Countries. *Nato Adv Sci*  
624 *Inst Se* **9**, 42 (2021).

625 7. Tegally, H. *et al.* Emergence and rapid spread of a new severe acute respiratory syndrome-  
626 related coronavirus 2 (SARS-CoV-2) lineage with multiple spike mutations in South Africa.  
627 *medRxiv* (2020) doi:10.1101/2020.12.21.20248640.

628 8. Naveca, F. *et al.* Phylogenetic relationship of SARS-CoV-2 sequences from Amazonas with  
629 emerging Brazilian variants harboring mutations E484K and N501Y in the Spike protein -  
630 SARS-CoV-2 coronavirus / nCoV-2019 Genomic Epidemiology - Virological.  
631 [https://virological.org/t/phylogenetic-relationship-of-sars-cov-2-sequences-from-amazonas-with-](https://virological.org/t/phylogenetic-relationship-of-sars-cov-2-sequences-from-amazonas-with-emerging-brazilian-variants-harboring-mutations-e484k-and-n501y-in-the-spike-protein/585)  
632 [emerging-brazilian-variants-harboring-mutations-e484k-and-n501y-in-the-spike-protein/585](https://virological.org/t/phylogenetic-relationship-of-sars-cov-2-sequences-from-amazonas-with-emerging-brazilian-variants-harboring-mutations-e484k-and-n501y-in-the-spike-protein/585)  
633 (2021).

634 9. Rambaut, A. *et al.* Preliminary genomic characterisation of an emergent SARS-CoV-2 lineage  
635 in the UK defined by a novel set of spike mutations - SARS-CoV-2 coronavirus / nCoV-2019  
636 Genomic Epidemiology - Virological. [https://virological.org/t/preliminary-genomic-](https://virological.org/t/preliminary-genomic-characterisation-of-an-emergent-sars-cov-2-lineage-in-the-uk-defined-by-a-novel-set-of-spike-mutations/563)  
637 [characterisation-of-an-emergent-sars-cov-2-lineage-in-the-uk-defined-by-a-novel-set-of-spike-](https://virological.org/t/preliminary-genomic-characterisation-of-an-emergent-sars-cov-2-lineage-in-the-uk-defined-by-a-novel-set-of-spike-mutations/563)  
638 [mutations/563](https://virological.org/t/preliminary-genomic-characterisation-of-an-emergent-sars-cov-2-lineage-in-the-uk-defined-by-a-novel-set-of-spike-mutations/563) (2020).

639 10. Bamlanivimab EUA Letter of Authorization Reissue 02092021.  
640 <https://www.fda.gov/media/143603/download>.

641 11. Casirivimab and Imdevimab EUA Fact Sheet for Healthcare Providers.  
642 <https://www.fda.gov/media/143892/download>.

- 643 12. Lilly's neutralizing antibody bamlanivimab (LY-CoV555) prevented COVID-19 at nursing  
644 homes in the BLAZE-2 trial, reducing risk by up to 80 percent for residents.  
645 <https://investor.lilly.com/node/44291/pdf>.
- 646 13. Gottlieb, R. L. *et al.* Effect of Bamlanivimab as Monotherapy or in Combination With  
647 Etesevimab on Viral Load in Patients With Mild to Moderate COVID-19. *Jama* **325**, 632–644  
648 (2021).
- 649 14. Chen, P. *et al.* SARS-CoV-2 Neutralizing Antibody LY-CoV555 in Outpatients with Covid-  
650 19. *New Engl J Med* (2020) doi:10.1056/nejmoa2029849.
- 651 15. Weinreich, D. M. *et al.* REGN-COV2, a Neutralizing Antibody Cocktail, in Outpatients with  
652 Covid-19. *New Engl J Med* **384**, 238–251 (2020).
- 653 16. Starr, T. N. *et al.* Prospective mapping of viral mutations that escape antibodies used to treat  
654 COVID-19. *Science* **371**, 850–854 (2021).
- 655 17. Wang, P. *et al.* Increased Resistance of SARS-CoV-2 Variants B.1.351 and B.1.1.7 to  
656 Antibody Neutralization. *Biorxiv* 2021.01.25.428137 (2021) doi:10.1101/2021.01.25.428137.
- 657 18. Schäfer, A. *et al.* Antibody potency, effector function, and combinations in protection and  
658 therapy for SARS-CoV-2 infection in vivo. *J Exp Med* **218**, (2020).
- 659 19. Winkler, E. S. *et al.* Human neutralizing antibodies against SARS-CoV-2 require intact Fc  
660 effector functions and monocytes for optimal therapeutic protection. *Biorxiv* 2020.12.28.424554  
661 (2020) doi:10.1101/2020.12.28.424554.
- 662 20. Bournazos, S. & Ravetch, J. V. Fcγ Receptor Function and the Design of Vaccination  
663 Strategies. *Immunity* **47**, 224–233 (2017).
- 664 21. Pinto, D. *et al.* Cross-neutralization of SARS-CoV-2 by a human monoclonal SARS-CoV  
665 antibody. *Nature* **583**, 290–295 (2020).
- 666 22. Pinto, D. *et al.* Cross-neutralization of SARS-CoV-2 by a human monoclonal SARS-CoV  
667 antibody. *Nature* **583**, 290–295 (2020).
- 668 23. Ko, S.-Y. *et al.* Enhanced neonatal Fc receptor function improves protection against primate  
669 SHIV infection. *Nature* **514**, 642 (2014).
- 670 24. Zalevsky, J. *et al.* Enhanced antibody half-life improves in vivo activity. *Nat Biotechnol* **28**,  
671 157 (2010).
- 672 25. Gaudinski, M. R. *et al.* Safety and pharmacokinetics of the Fc-modified HIV-1 human  
673 monoclonal antibody VRC01LS: A Phase 1 open-label clinical trial in healthy adults. *Plos Med*  
674 **15**, e1002493 (2018).

- 675 26. Bournazos, S., Corti, D., Virgin, H. W. & Ravetch, J. V. Fc-optimized antibodies elicit CD8  
676 immunity to viral respiratory infection. *Nature* 1–9 (2020) doi:10.1038/s41586-020-2838-z.
- 677 27. Weitzenfeld, P., Bournazos, S. & Ravetch, J. V. Antibodies targeting sialyl Lewis A mediate  
678 tumor clearance through distinct effector pathways. *J Clin Invest* **129**, 3952–3962 (2019).
- 679 28. Bournazos, S., Corti, D., Virgin, H. W. & Ravetch, J. V. Fc-optimized antibodies elicit CD8  
680 immunity to viral respiratory infection. *Nature* 1–9 (2020) doi:10.1038/s41586-020-2838-z.
- 681 29. Diamond, M. *et al.* SARS-CoV-2 variants show resistance to neutralization by many  
682 monoclonal and serum-derived polyclonal antibodies. *Res Square* (2021) doi:10.21203/rs.3.rs-  
683 228079/v1.
- 684 30. Chen, R. E. *et al.* Resistance of SARS-CoV-2 variants to neutralization by monoclonal and  
685 serum-derived polyclonal antibodies. *Nat Med* 1–10 (2021) doi:10.1038/s41591-021-01294-w.
- 686 31. Kallewaard, N. L. *et al.* Structure and Function Analysis of an Antibody Recognizing All  
687 Influenza A Subtypes. *Cell* **166**, 596–608 (2016).
- 688 32. DiLillo, D. J., Tan, G. S., Palese, P. & Ravetch, J. V. Broadly neutralizing hemagglutinin  
689 stalk-specific antibodies require FcγR interactions for protection against influenza virus in vivo.  
690 *Nat Med* **20**, 143–151 (2014).
- 691 33. Dunand, C. J. H. *et al.* Both Neutralizing and Non-Neutralizing Human H7N9 Influenza  
692 Vaccine-Induced Monoclonal Antibodies Confer Protection. *Cell Host Microbe* **19**, 800–813  
693 (2016).
- 694 34. Leon, P. E. *et al.* Optimal activation of Fc-mediated effector functions by influenza virus  
695 hemagglutinin antibodies requires two points of contact. *Proc National Acad Sci* **113**, E5944–  
696 E5951 (2016).
- 697 35. Bruhns, P. *et al.* Specificity and affinity of human Fcγ receptors and their polymorphic  
698 variants for human IgG subclasses. *Blood* **113**, 3716–3725 (2009).
- 699 36. Weitzenfeld, P., Bournazos, S. & Ravetch, J. V. Antibodies targeting sialyl Lewis A mediate  
700 tumor clearance through distinct effector pathways. *J Clin Invest* **129**, 3952–3962 (2019).
- 701 37. Cheng, Z. J. *et al.* Development of a robust reporter-based ADCC assay with frozen, thaw-  
702 and-use cells to measure Fc effector function of therapeutic antibodies. *J Immunol Methods* **414**,  
703 69–81 (2014).
- 704 38. Arvin, A. M. *et al.* A perspective on potential antibody-dependent enhancement of SARS-  
705 CoV-2. *Nature* 1–11 (2020) doi:10.1038/s41586-020-2538-8.
- 706 39. Joyner, M. J. & Wright, R. S. Safety Update: CO VID-19 Convalescent Plasma in  
707 20,000 Hospitalized Patients. *Mayo Clinic Proceedings* (2020).

- 708 40. Arvin, A. M. *et al.* A perspective on potential antibody-dependent enhancement of SARS-  
709 CoV-2. *Nature* **584**, 353–363 (2020).
- 710 41. Khurana, S. *et al.* Vaccine-induced anti-HA2 antibodies promote virus fusion and enhance  
711 influenza virus respiratory disease. *Sci Transl Med* **5**, 200ra114 (2013).
- 712 42. Winarski, K. L. *et al.* Antibody-dependent enhancement of influenza disease promoted by  
713 increase in hemagglutinin stem flexibility and virus fusion kinetics. *Proc National Acad Sci* **116**,  
714 15194–15199 (2019).
- 715 43. Hui, K. P. Y. *et al.* Tropism, replication competence, and innate immune responses of the  
716 coronavirus SARS-CoV-2 in human respiratory tract and conjunctiva: an analysis in ex-vivo and  
717 in-vitro cultures. *Lancet Respir Medicine* (2020) doi:10.1016/s2213-2600(20)30193-4.
- 718 44. Liu, Z. *et al.* Identification of Common Deletions in the Spike Protein of Severe Acute  
719 Respiratory Syndrome Coronavirus 2. *J Virol* **94**, (2020).
- 720 45. Baum, A. *et al.* Antibody cocktail to SARS-CoV-2 spike protein prevents rapid mutational  
721 escape seen with individual antibodies. *Science* **369**, 1014–1018 (2020).
- 722 46. Thomson, E. C. *et al.* Circulating SARS-CoV-2 spike N439K variants maintain fitness while  
723 evading antibody-mediated immunity. *Cell* (2021) doi:10.1016/j.cell.2021.01.037.
- 724 47. Starr, T. N., Greaney, A. J., Dingens, A. S. & Bloom, J. D. Complete map of SARS-CoV-2  
725 RBD mutations that escape the monoclonal antibody LY-CoV555 and its cocktail with LY-  
726 CoV016. doi:10.1101/2021.02.17.431683.
- 727 48. Wise, J. Covid-19: The E484K mutation and the risks it poses. *Bmj* **372**, n359 (2021).
- 728 49. VIR-7831 for the Early Treatment of COVID-19 in Outpatients - Full Text View -  
729 ClinicalTrials.gov. [https://clinicaltrials.gov/ct2/show/NCT04545060?term=VIR-  
730 7831&draw=2&rank=2](https://clinicaltrials.gov/ct2/show/NCT04545060?term=VIR-7831&draw=2&rank=2).
- 731 50. A Study of Immune System Proteins in Participants With Mild to Moderate COVID-19  
732 Illness - Full Text View - ClinicalTrials.gov.  
733 <https://clinicaltrials.gov/ct2/show/NCT04634409?term=VIR-7831&draw=2&rank=3>.
- 734 51. Vir Biotechnology and GSK announce NHS-supported AGILE study to evaluate VIR-7832  
735 in the early treatment of COVID-19 | GSK. *undefined* [https://www.gsk.com/en-gb/media/press-  
736 releases/vir-biotechnology-and-gsk-announce-nhs-supported-agile-study-to-evaluate-vir-7832-  
737 in-the-early-treatment-of-covid-19/](https://www.gsk.com/en-gb/media/press-releases/vir-biotechnology-and-gsk-announce-nhs-supported-agile-study-to-evaluate-vir-7832-in-the-early-treatment-of-covid-19/).
- 738 52. Wise, J. Covid-19: New coronavirus variant is identified in UK. *Bmj* **371**, m4857 (2020).
- 739 53. CoVariants. <https://covariants.org/>.

740 54. Piccoli, L. *et al.* Mapping neutralizing and immunodominant sites on the SARS-CoV-2 spike  
741 receptor-binding domain by structure-guided high-resolution serology. *Cell* (2020)  
742 doi:10.1016/j.cell.2020.09.037.

743 55. Rappazzo, C. G. *et al.* Broad and potent activity against SARS-like viruses by an engineered  
744 human monoclonal antibody. *Science* **371**, 823–829 (2021).

745 56. Sette, A. & Crotty, S. Adaptive immunity to SARS-CoV-2 and COVID-19. *Cell* **184**, 861–  
746 880 (2021).

747 57. Stettler, K. *et al.* Specificity, cross-reactivity and function of antibodies elicited by Zika virus  
748 infection. *Science* **353**, aaf8505 (2016).

749

## 750 **FIGURE LEGENDS**

751 **Figure 1.** VIR-7831 and VIR-7831 bind S and neutralize SARS-CoV-2 virus and S variants of concern in  
752 vitro. a) Binding of VIR-7831 (black circles) and VIR-7832 (blue squares) to SARS-CoV-2 RBD was  
753 tested by ELISA. Shown is the average of four replicates and SD derived from three independent  
754 experiments. b) Association and dissociation profiles of VIR-7831 to SARS-CoV-2-RBD were measured  
755 using SPR. The double reference subtracted curves (shown for single replicates) are plotted together with  
756 the curve fit in black (obscured by close overlay with the data). Values are from two independent  
757 experiments. c) Binding of VIR-7831 (black circles) and VIR-7832 (blue squares) to cell-surface S  
758 protein was determined by flow cytometry. Data are expressed as the percentage of the positive cells.  
759 Results shown are from one experiment and representative of three independent experiments performed.  
760 d) In vitro neutralization of live SARS-CoV-2 by different concentrations of VIR-7831 (left) and VIR-  
761 7832 (right) measured by nucleocapsid staining 6-hours post-infection. Results shown are from one  
762 experiment and representative of at least three independent experiments performed.

763 **Figure 2.** VIR-7831 and VIR-7832 demonstrate effector function in vitro. In vitro effector function (a-e)  
764 activation profiles of human FcγRIIa (a), FcγRIIb (b), FcγRIIIa low-affinity (F158) (c) or FcγRIIIa high-  
765 affinity binding allele (V158) (d) using bioreporter assays using S-expressing CHO cells as the target

766 antigen. Data points show means $\pm$  SD of duplicates. NK-cell mediated killing (ADCC) of S-expressing  
767 CHO cells using freshly isolated cells from two donors previously genotyped for homozygous expression  
768 of low-affinity (F/F158) (e) or high-affinity (V/V158) Fc $\gamma$ RIIIa (f). Data points are means of  
769 quadruplicates  $\pm$  SD. g) Antibody-dependent cellular phagocytosis (ADCP) using S-expressing CHO cells  
770 and freshly isolated PBMCs. Data represent the means of duplicates  $\pm$  SD.

771 **Figure 3.** VIR-7831 shows in vivo efficacy in a hamster SARS-CoV-2 model of infection. a) Overview  
772 of hamster in vivo study design. b) and c) Animal weight over time as a percent of starting weight in  
773 animals dosed a Day -1 (b) or Day -2 (c). Medians of at least N=6 animals and interquartile range are  
774 shown. d) and e) Day 4 terminal weights expressed as a percentage of starting weight for animals dosed at  
775 Day -1 (d) or Day -2 (e). Bar denotes median values. f) and g) Day 4 lung viral load in Day -1 (f) or Day -  
776 2 (g) treated animals as assessed by RT-qPCR. Bar denotes median values. h) and i) infectious virus in  
777 lung at Day 4 for Day -1 (h) or Day -2 (i) dosed animals. Bar denotes median values. ns=not significant,  
778 \*\* =  $p < 0.05$ , and \*\*\* =  $< 0.005$  as assessed by the Mann-Whitney U-test.

779 **Table 1.** VIR-7831 and VIR-7832 retain activity against S variants of concern in an authentic virus  
780 system. Average fold change in VIR-7831 and VIR-7832 IC<sub>50</sub> compared to relative wild-type controls for  
781 S variants tested in an authentic virus system. Data shown are averages of at least two independent  
782 experiments.

783 **Table 2.** VIR-7831 and VIR-7832 retain activity against S variants of concern in a pseudotyped virus  
784 system. Average fold change in VIR-7831 and VIR-7832 IC<sub>50</sub> compared to relative wild-type controls for  
785 S variants tested in a VSV/VeroE6 pseudotyped virus system. Data shown are averages of at least two  
786 independent experiments.

787 **Table 3.** VIR-7831 and VIR-7832 retain activity against variants that confer resistance to authorized  
788 mAbs. Activity of VIR-7831 against variants conferring reduced susceptibility to bamlanivimab,  
789 imdevimab or casirivimab in a VSV/VeroE6 pseudotyped virus system. The geometric mean of IC<sub>50</sub>s and



790 average fold-change versus the relative wild-type control from at least two independent experiments are  
791 shown.

792 **Table 4.** The VIR-7831/VIR-7832 epitope is highly conserved. Conservation data comprising >1,000,000  
793 sequences from the GISAID database and variants at each position are shown. Variants in bold were  
794 tested in a pseudotyped virus assay.

795 **Table 5.** Activity of VIR-7831 against epitope variants. VIR-7831/VIR-7832 epitope variants detected in  
796 sequences from the GISAID database were tested in a VSV/VeroE6 pseudotyped virus system. The  
797 geometric mean of IC<sub>50</sub>s and average fold-change versus the relative wild-type control from at least two  
798 independent experiments are shown. Variants marked with “a” indicates that the data shown are from the  
799 parental antibody S309.

800 **Supplemental Figure 1.** Binding of VIR-7831 and VIR-7832 to human FcγRs and C1q as measured by  
801 SPR. Binding of VIR-7831 and VIR-7832 to a) human FcγRIIa (H131 and R131 alleles), FcγRIIIa (F158  
802 and V158 alleles) and FcγRIIb were measured using SPR. Biotinylated purified FcγRs were captured on  
803 the sensor chip surface prior to injection of VIR-7831 or VIR-7832. Association and dissociation profiles  
804 (separated by the vertical dotted line) were measured in real time as change in the SPR signal. b) Binding  
805 of VIR-7831 and VIR-7832 to complement component C1q was measured using BLI on an Octet Red96  
806 instrument. Association and dissociation profiles (separated by the vertical dotted line) were measured in  
807 real time as change in the interference pattern.

808 **Supplemental Figure 2.** Sub-neutralizing concentrations of VIR-7831 and VIR-7832 do not enhance  
809 viral entry, viral replication or cytokine production in vitro. Internalization (a) and replication (b) of  
810 SARS-CoV-2 was evaluated in VeroE6, moDCs or PBMCs at various timepoints. Two independent  
811 experiments with human moDCs and PBMCs from three individual donors were analyzed (5 unique  
812 moDC donors, 6 unique PBMC donors total between two experiments). VeroE6 cells were run in  
813 duplicate for both independent experiments. Data from each replicate well from two independent



814 experiments are plotted as individual points, with horizontal lines representing the median. Mann-  
815 Whitney U-test comparison to no antibody group, \* $p < 0.05$ . c) Supernatant cytokine and chemokine levels  
816 as measured by MSD at the indicated time post infection. Data from two independent experiments (three  
817 replicates each, five unique donors) are plotted as the mean and SD.

818 **Supplemental Figure 3.** Overview of VIR-7832 resistance selection method. All passaging was  
819 conducted in duplicate wells. (a) VIR-7832 concentration was increased during each passage. P3 X  
820 indicates passage 3 virus, after which virus was lost with subsequent increases in concentration. In (b) and  
821 (c), p3X denotes where passage 3 virus from (a) was used to initiate (b) viral lineage 1 and (c) viral  
822 lineage 2. Arrows indicate passages that were subjected to sequence analysis, and \* indicate the passages  
823 in lineage 1 with no detectable virus or CPE. Selection continued for a total of eight passages.

824 **Supplemental Table 1.** Amino acid substitutions identified in the SARS-CoV-2 S upon in vitro selection  
825 with VIR-7832. Spike gene sequences were compared to a SARS-CoV-2 reference sequence (NCBI:  
826 NC\_045512.2) to identify variants. Fold-changes in  $IC_{50}$  were determined compared to the SARS-CoV-2  
827 virus stock.

828 **Supplemental Table 2.** VIR-7831 and VIR-7832 activity against selected S variants. VIR-7831/VIR-  
829 7832 epitope variants observed by in vitro resistance selection were individually tested in a VSV/VeroE6  
830 pseudotyped virus system. The geometric mean of  $IC_{50}$ s and average fold-change versus the relative wild-  
831 type control from at least two independent experiments are shown.

832

Figure 1

a)

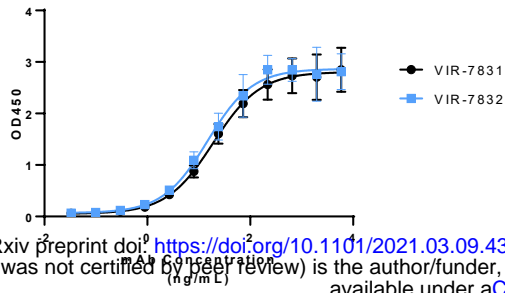

b)

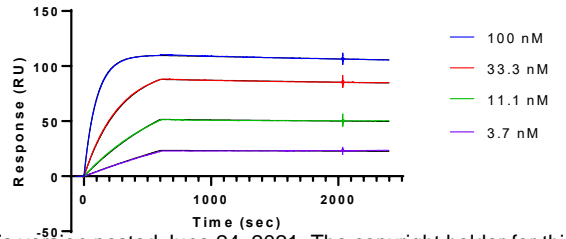

c)

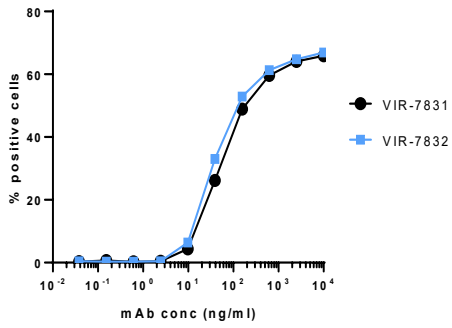

d)

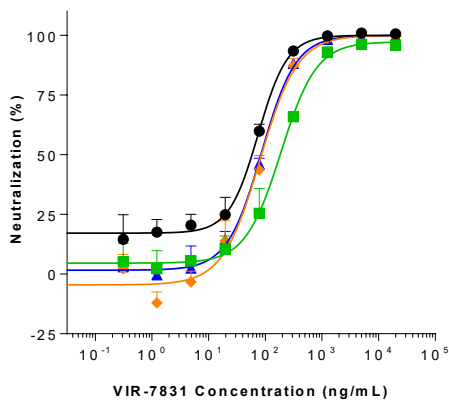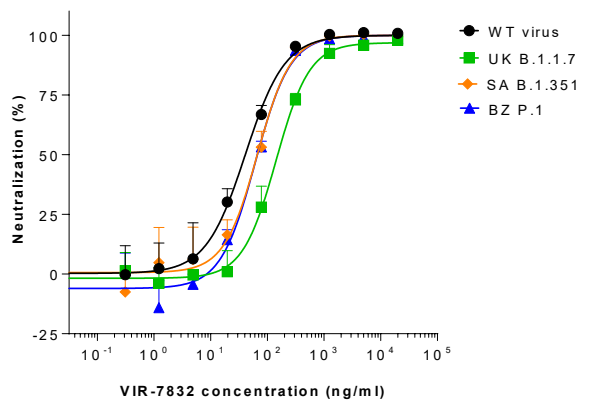

Figure 2

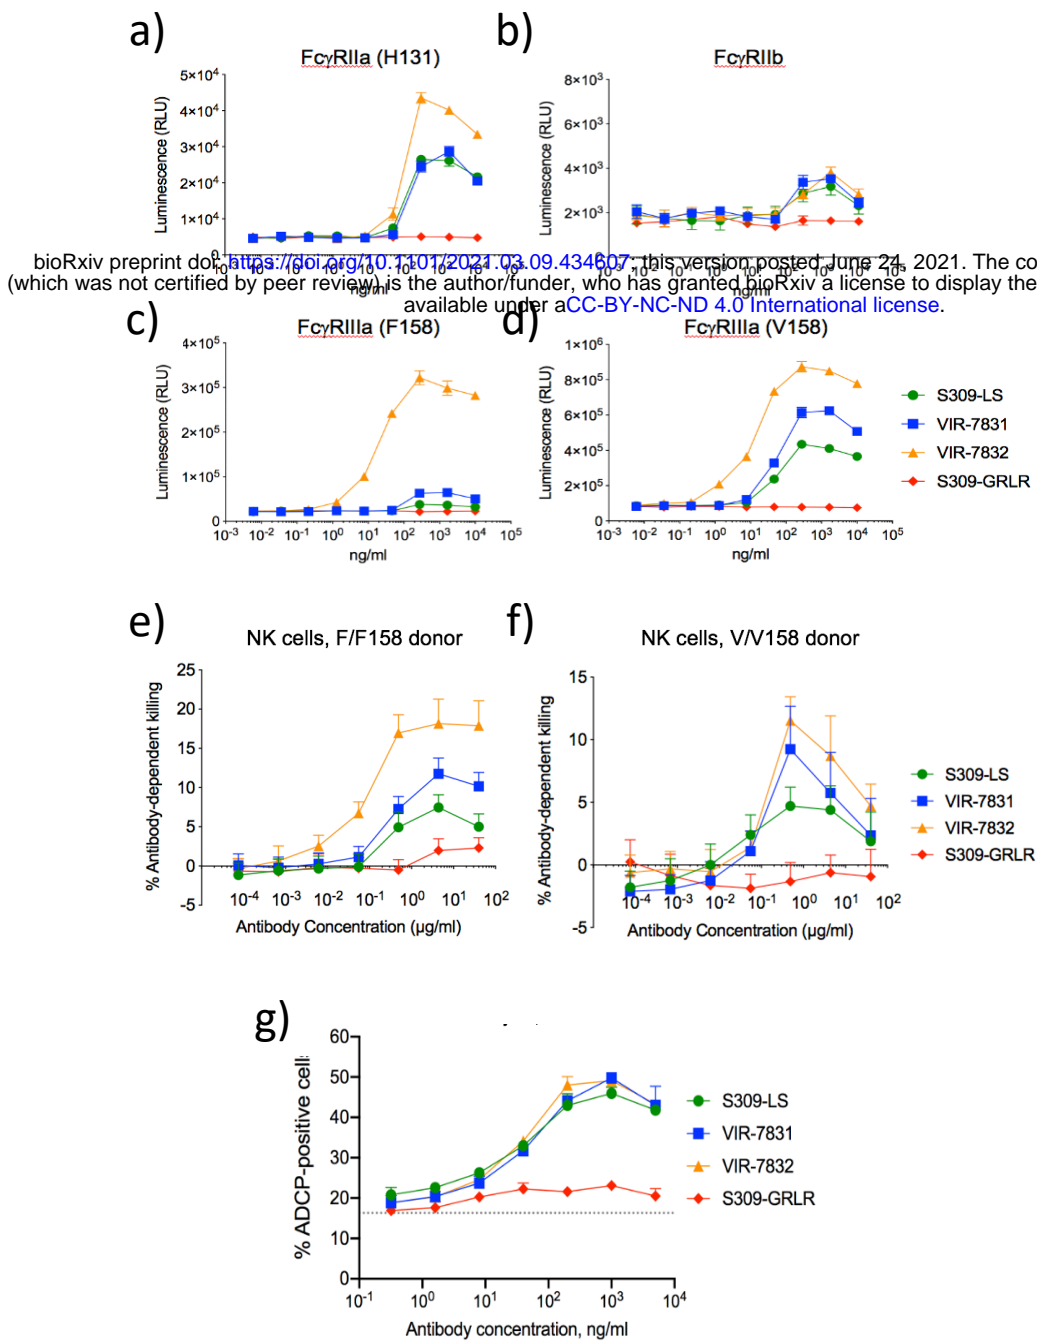

Figure 3

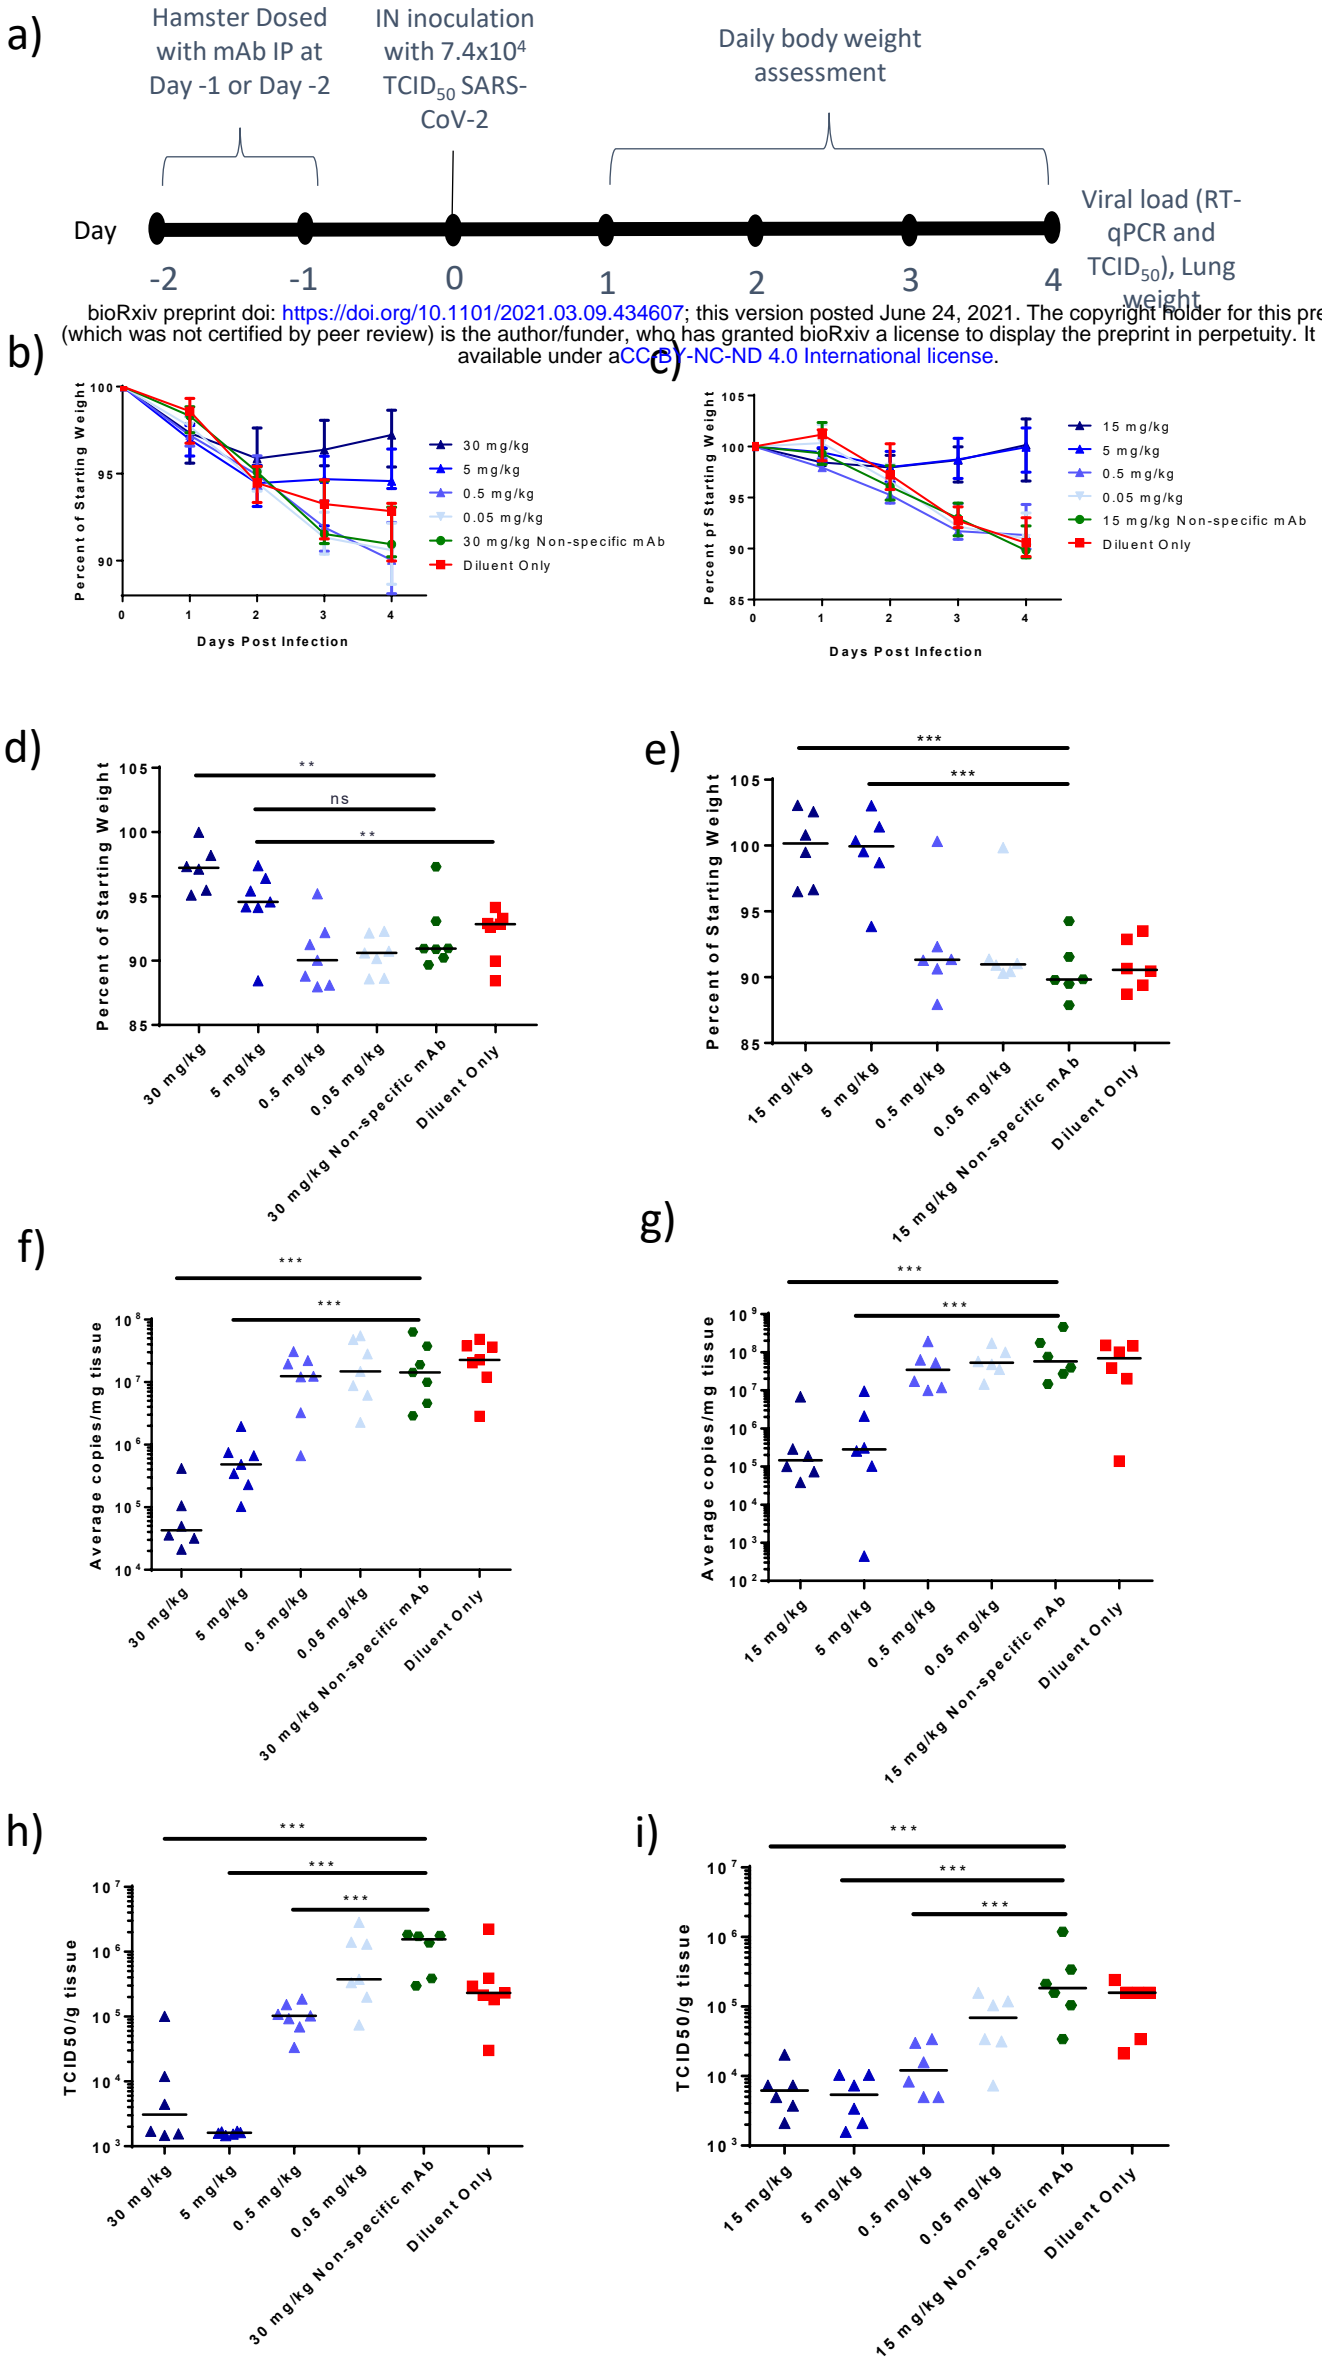

Table 1

bioRxiv preprint doi: <https://doi.org/10.1101/2021.03.09.434607>; this version posted June 24, 2021. The copyright holder for this preprint (which was not certified by peer review) is the author/funder, who has granted bioRxiv a license to display the preprint in perpetuity. It is made available under aCC-BY-NC-ND 4.0 International license.

| <b>SARS-CoV-2 Variant</b> | <b>Geometric Mean VIR-7831 IC<sub>50</sub> (ng/ml) (Average Fold Change IC<sub>50</sub> vs. Wild-Type)</b> | <b>Geometric Mean VIR-7831 IC<sub>90</sub> (ng/ml) (Average Fold Change IC<sub>90</sub> vs. Wild-Type)</b> | <b>Geometric Mean VIR-7832 IC<sub>50</sub> (ng/ml) (Average Fold Change IC<sub>50</sub> vs. Wild-Type)</b> | <b>Geometric Mean VIR-7832 IC<sub>90</sub> (ng/ml) (Average Fold Change IC<sub>90</sub> vs. Wild-Type)</b> |
|---------------------------|------------------------------------------------------------------------------------------------------------|------------------------------------------------------------------------------------------------------------|------------------------------------------------------------------------------------------------------------|------------------------------------------------------------------------------------------------------------|
| UK (B.1.1.7)              | 187.15 (3.0)                                                                                               | 1246.86 (4.1)                                                                                              | 181.12 (3.1)                                                                                               | 1222.95 (3.7)                                                                                              |
| South Africa (B.1.351)    | 71.89 (1.2)                                                                                                | 385.01 (1.3)                                                                                               | 59.67 (1.1)                                                                                                | 309.84 (0.9)                                                                                               |
| Brazil (P.1)              | 73.11 (1.6)                                                                                                | 335.79 (1.4)                                                                                               | 48.94 (1.2)                                                                                                | 217.02 (0.9)                                                                                               |

Table 2

bioRxiv preprint doi: <https://doi.org/10.1101/2021.03.09.434607>; this version posted June 24, 2021. The copyright holder for this preprint (which was not certified by peer review) is the author/funder, who has granted bioRxiv a license to display the preprint in perpetuity. It is made available under aCC-BY-NC-ND 4.0 International license.

| Variant                               | Spike Mutations                                                                   | Fold-Change in<br>VIR-7831 IC <sub>50</sub><br>vs. Wild-type | Fold-Change in<br>VIR-7832 IC <sub>50</sub><br>vs. Wild-type |
|---------------------------------------|-----------------------------------------------------------------------------------|--------------------------------------------------------------|--------------------------------------------------------------|
| South Africa (B.1.351; Beta)          | L18F, D80A, D215G, R246I, K417N, E484K, N501Y, D614G, A701V                       | 0.6                                                          | 0.7                                                          |
| UK (B.1.1.7; Alpha)                   | H69-, V70-, Y144-, N501Y, A570D, D614G, P681H, T716I, S982A, D1118H               | 2.3                                                          | 2.5                                                          |
| Brazil (P.1; Gamma)                   | D138Y, D614G, E484K, H655Y, K417T, L18F, N501Y, P26S, R190S, T1027I, T20N, V1176F | 0.4                                                          | 0.4                                                          |
| Mexico/Swiss (B.1.1.519)              | T478K, D614G, P681H, T732A                                                        | 0.8                                                          | NT                                                           |
| New York (B.1.526; Iota)              | L5F, T95I, D253G, E484K, D614G, A701V                                             | 0.6                                                          | NT                                                           |
| Scotland (B.1.258)                    | H69-, V70-, N439K, D614G,                                                         | 0.9                                                          | NT                                                           |
| Nigeria (B.1.525; Eta)                | Q52R, A67V, H69-, V70-, Y144-, E484K, D614G, Q677H, F888L                         | 0.9                                                          | NT                                                           |
| US (R.2)                              | E484K, D614G, Q677H, T732S, E1202Q                                                | 0.8                                                          | NT                                                           |
| California (B.1.427/B.1.429; Epsilon) | S13I, W152C, L452R, D614G                                                         | 0.7                                                          | NT                                                           |
| Liverpool (A.23.1)                    | R102I, F157L, V367F, E484K, Q613H, P681R                                          | 1.1                                                          | NT                                                           |
| India (B.1.617.1; Kappa)              | T95I, G142D, E154K, L452R, E484Q, D614G, P681R, Q1071H                            | 0.7                                                          | NT                                                           |
| India (B.1.617.2; Delta)              | T19R, G142D, E156G, F157-, R158-, L452R, T478K, D614G, P681R, D950N               | 1.0                                                          | NT                                                           |
| Cameroon (B.1.619)                    | I210T, N440K, E484K, D614G, D936N, S939F, T1027I                                  | 1.3                                                          | NT                                                           |
| Bristol (B.1.1.7+E484K)               | H69-, V70-, Y144-, E484K, N501Y, A570D, D614G, P681H, T716I, S982A, D1118H        | 1.7                                                          | NT                                                           |

Table 3

| Amino Acid position | Substitution / Deletion | mAb with Reduced Susceptibility | Variants in Tested Spike Sequence | VIR-7831 EC <sub>50</sub> (ng/ml) | Average Fold Change in EC <sub>50</sub> Compared to Relative Wild-Type |
|---------------------|-------------------------|---------------------------------|-----------------------------------|-----------------------------------|------------------------------------------------------------------------|
| E406                | W                       | casirivimab, imdevimab          |                                   | 3.66                              | 0.74                                                                   |
| K417                | E                       | casirivimab                     | K417E                             | 67.71                             | 0.89                                                                   |
| N439                | K                       | imdevimab                       | N439K, D614G                      | 17.05                             | 0.86                                                                   |
| N440                | D                       | imdevimab                       | N440D                             | 80.47                             | 1.29                                                                   |
| N440                | K                       | imdevimab                       | N440K, D614G                      | 19.99                             | 0.48                                                                   |
| K444                | Q                       | imdevimab                       | K444Q                             | 79.68                             | 1.11                                                                   |
| V445                | A                       | imdevimab                       | V445A                             | 41.74                             | 3.38                                                                   |
| G446                | V/I                     | imdevimab                       | G446V, D614G                      | 18.41                             | 1.50                                                                   |
| Y453                | F                       | casirivimab                     | G261D, Y453F                      | 27.28                             | 2.19                                                                   |
| L455                | F                       | casirivimab                     | L455F, D614G                      | 21.65                             | 0.56                                                                   |
| G476                | S                       | casirivimab                     | G476S                             | 36.97                             | 2.94                                                                   |
| E484                | K                       | bamlanivimab                    | E484K, D614G                      | 12.91                             | 0.33                                                                   |
| F486                | V/I                     | casirivimab                     | F486V                             | 82.24                             | 1.10                                                                   |
| Y489                | H                       | casirivimab                     | Y489H                             | 92.29                             | 1.48                                                                   |
| F490                | S                       | bamlanivimab                    | F490S                             | 33.10                             | 0.85                                                                   |
| Q493                | K                       | casirivimab, bamlanivimab       | Q483K                             | 69.79                             | 0.98                                                                   |
| S494                | P                       | casirivimab, bamlanivimab       | S494P, D614G                      | 29.10                             | 2.50                                                                   |

bioRxiv preprint doi: <https://doi.org/10.1101/2021.08.09.434807>; this version posted July 24, 2021. The copyright holder for this preprint (which was not certified by peer review) is the author/funder, who has granted bioRxiv a license to display the preprint in perpetuity. It is made available under aCC-BY-NC-ND 4.0 International license.

Table 4

| Amino Acid Position | Reference Amino Acid <sup>a</sup> | Variants Identified in order of Prevalence <sup>b</sup> | Percent Reference AA Conservation |
|---------------------|-----------------------------------|---------------------------------------------------------|-----------------------------------|
| 332                 | I                                 | V, T                                                    | >99.99                            |
| 333                 | I                                 | L, N                                                    | >99.99                            |
| 334                 | N                                 | K, H, Y, D                                              | >99.99                            |
| 335                 | L                                 | F, S, M                                                 | 99.99                             |
| 336                 | C                                 | S                                                       | >99.99                            |
| 337                 | P                                 | S, T, L, H, R                                           | >99.99                            |
| 339                 | G                                 | D, S, V, C, F                                           | 99.98                             |
| 340                 | E                                 | D, K, G, A, Q                                           | 99.99                             |
| 341                 | V                                 | I, A, P, S                                              | 99.99                             |
| 343                 | N                                 | S                                                       | >99.99                            |
| 344                 | A                                 | S, V, T, D, F, P                                        | 99.98                             |
| 345                 | T                                 | S, I, N                                                 | >99.99                            |
| 346                 | R                                 | K, I, S, G, T, F                                        | 99.94                             |
| 354                 | N                                 | D, K, S, H, G, Y                                        | 99.96                             |
| 356                 | K                                 | R, M, N, T, E, Y, G                                     | 99.99                             |
| 357                 | R                                 | K, I, G                                                 | 99.95                             |
| 358                 | I                                 | V, T, L, A, E, F                                        | >99.99                            |
| 359                 | S                                 | N, T, R, G, I                                           | 99.99                             |
| 360                 | N                                 | S, A, T, Y                                              | >99.99                            |
| 361                 | C                                 | T                                                       | >99.99                            |
| 440                 | N                                 | K, T, Y, S, D, I, H                                     | 99.89                             |
| 441                 | L                                 | F, I, R, V                                              | >99.99                            |
| 509                 | R                                 | I, K, S, T, P                                           | >99.99                            |

bioRxiv preprint doi: <https://doi.org/10.1101/2021.03.09.434607>; this version posted June 24, 2021. The copyright holder for this preprint (which was not certified by peer review) is the author/funder, who has granted bioRxiv a license to display the preprint in perpetuity. It is made available under aCC-BY-NC-ND 4.0 International license.



Table 5

| Epitope Reference Amino Acid | Amino Acid Changes in Spike protein | Geomean Neutralization EC <sub>50</sub> (ng/mL) | Average Fold-Change VIR-7831 EC <sub>50</sub> Relative to Wild-Type |
|------------------------------|-------------------------------------|-------------------------------------------------|---------------------------------------------------------------------|
| R333                         | R333I, D614G                        | 30.93                                           | 0.50                                                                |
| N334                         | N334K, D614G                        | 45.36                                           | 1.27                                                                |
| L335                         | L335F                               | 29.19                                           | 0.81                                                                |
| P337                         | P337H, D614G <sup>a</sup>           | 225.49                                          | 7.50                                                                |
|                              | P337L, D614G <sup>a</sup>           | 5241.44                                         | 180.46                                                              |
|                              | P337R, D614G <sup>a</sup>           | >10000                                          | >276                                                                |
|                              | P337S, D614G                        | 127.69                                          | 1.26                                                                |
|                              | P337T, D614G <sup>a</sup>           | 199.78                                          | 5.38                                                                |
| G339                         | G339D, D614G                        | 117.38                                          | 1.18                                                                |
|                              | G339S, D614G                        | 32.67                                           | 0.63                                                                |
|                              | G339C, D614G                        | 68.79                                           | 1.18                                                                |
| E340                         | E340A                               | >10000                                          | >100                                                                |
|                              | E340K                               | >10000                                          | >297                                                                |
|                              | E340G, D614G <sup>a</sup>           | 1013.97                                         | 27.47                                                               |
| V341                         | V341I, D614G                        | 14.6                                            | 0.16                                                                |
| A344                         | A344S                               | 92.19                                           | 0.89                                                                |
|                              | A344T, D614G                        | 40.94                                           | 0.62                                                                |
| R346                         | R346K, D614G                        | 24.76                                           | 0.72                                                                |
|                              | R346I, D614G                        | 65.39                                           | 1.25                                                                |
|                              | R346S, D614G                        | 42.87                                           | 0.82                                                                |
|                              | R346T, D614G                        | 89.04                                           | 1.25                                                                |
| N354                         | N354D                               | 104.8                                           | 1.00                                                                |
|                              | N354K, T95I                         | 70.62                                           | 0.76                                                                |
|                              | N354S, D614G                        | 61.78                                           | 0.89                                                                |
|                              | N354H, D614G                        | 74.88                                           | 1.06                                                                |
| K356                         | K356R, D614G                        | 29.61                                           | 0.57                                                                |
|                              | K356N, D614G                        | 53.22                                           | 1.12                                                                |
| R357                         | R357K, D614G                        | 39.13                                           | 0.75                                                                |
|                              | R357I, D614G                        | 46.41                                           | 0.98                                                                |
| I358                         | I358V, D614G                        | 32.71                                           | 0.70                                                                |
|                              | I358L                               | 44.01                                           | 0.80                                                                |
| S359                         | S359N                               | 95.55                                           | 0.96                                                                |
|                              | S359G, D614G                        | 37.56                                           | 0.80                                                                |
|                              | S359R, D614G                        | 62.0                                            | 0.89                                                                |
| N440                         | N440K, D614G                        | 19.99                                           | 0.48                                                                |
|                              | N440Y, D614G                        | 42.65                                           | 0.68                                                                |
|                              | N440S, D614G                        | 51.34                                           | 0.73                                                                |
| L441                         | L441F, D614G                        | 25.21                                           | 0.40                                                                |
|                              | L441I, D614G                        | 32.96                                           | 0.70                                                                |

bioRxiv preprint doi: <https://doi.org/10.1101/2021.06.24.443607>; this version posted June 24, 2021. The copyright holder for this preprint (which was not certified by peer review) is the author/funder, who has granted bioRxiv a license to display the preprint in perpetuity. It is made available under aCC-BY-NC-ND 4.0 International license.

# Supplemental Figure 1

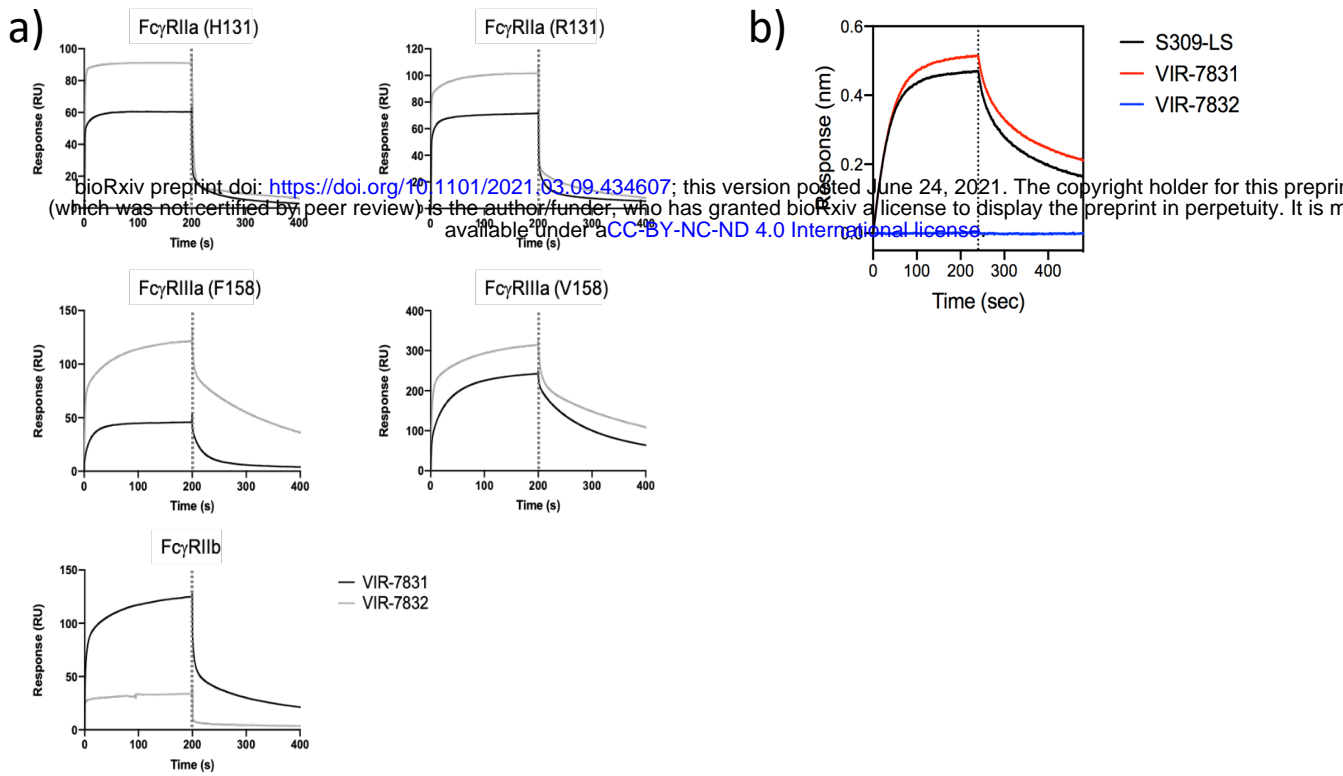

# Supplemental Figure 2

bioRxiv preprint doi: <https://doi.org/10.1101/2021.03.09.434607>; this version posted June 24, 2021. The copyright holder for this preprint (which was not certified by peer review) is the author/funder, who has granted bioRxiv a license to display the preprint in perpetuity. It is made available under aCC-BY-NC-ND 4.0 International license.

a)

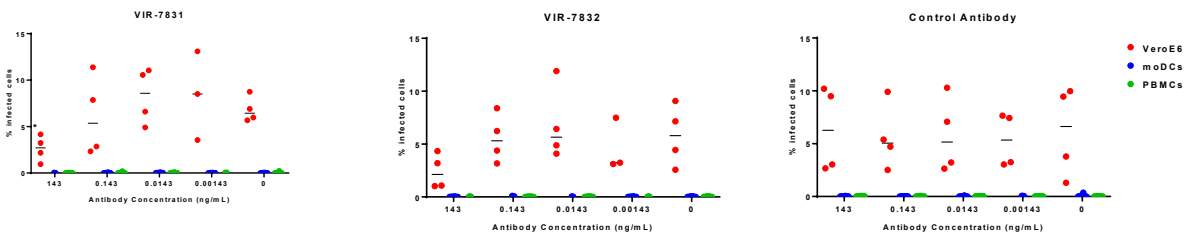

b)

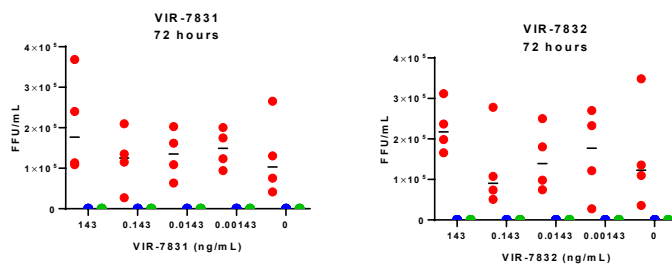

c)

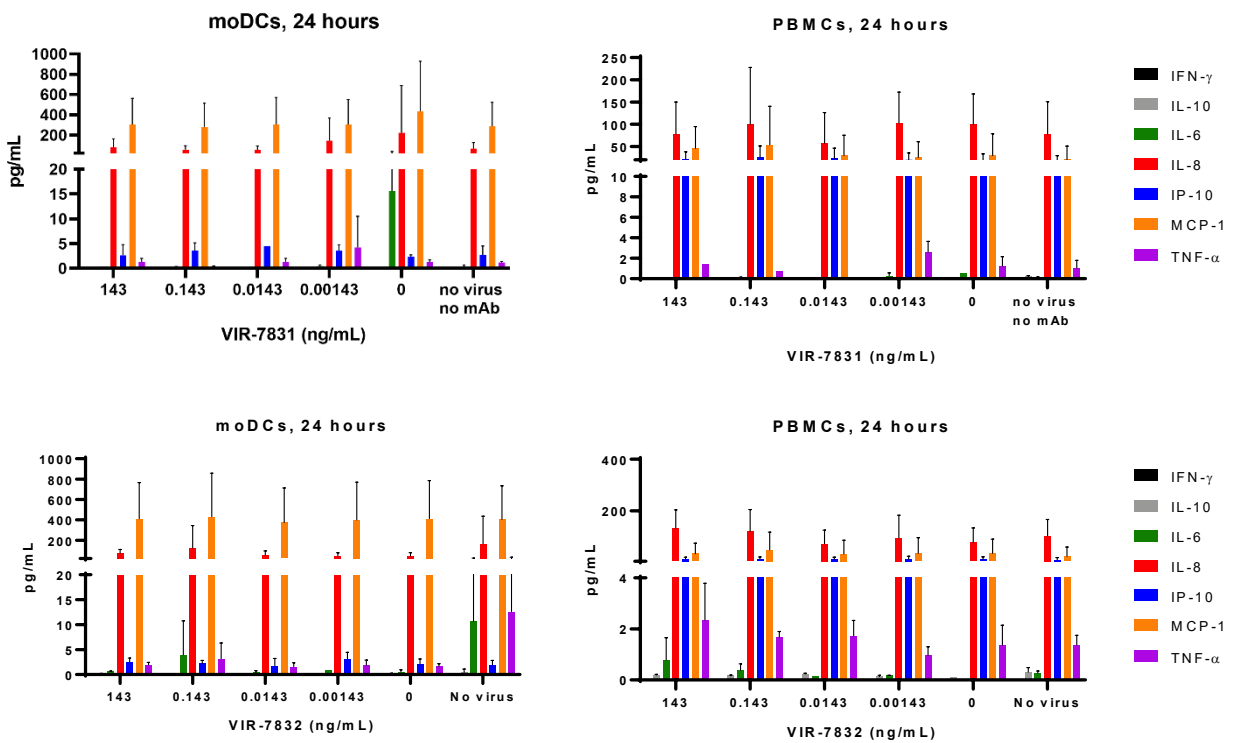

# Supplemental Figure 3

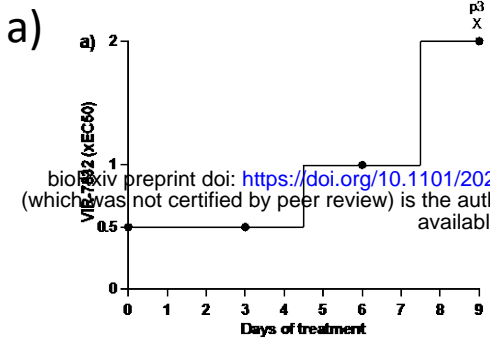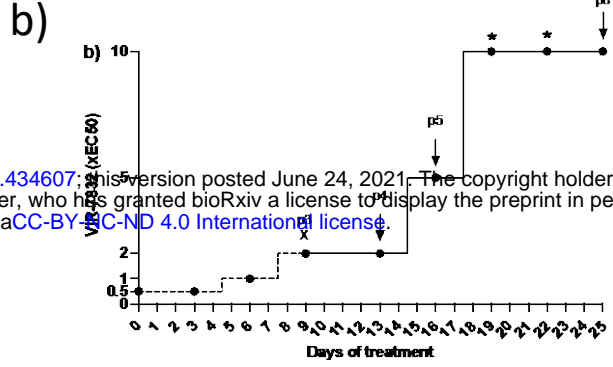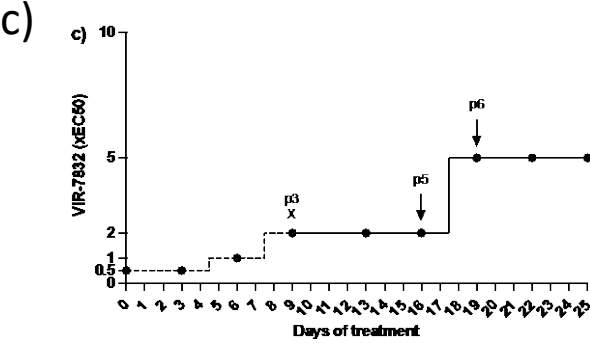

bioRxiv preprint doi: <https://doi.org/10.1101/2021.03.09.434607>; this version posted June 24, 2021. The copyright holder for this preprint (which was not certified by peer review) is the author/funder, who has granted bioRxiv a license to display the preprint in perpetuity. It is made available under aCC-BY-NC-ND 4.0 International license.

# Supplemental Table 1

| Passage                                                                                                                                                                                                                                                                                                                                                                                                                                                             | Spike Gene Amino Acid Substitution (Freq) <sup>a,b</sup>                       | EC <sub>50</sub> (µg/mL) | Fold Change in EC <sub>50</sub> to WT <sup>c</sup> |
|---------------------------------------------------------------------------------------------------------------------------------------------------------------------------------------------------------------------------------------------------------------------------------------------------------------------------------------------------------------------------------------------------------------------------------------------------------------------|--------------------------------------------------------------------------------|--------------------------|----------------------------------------------------|
| SARS-CoV-2 virus stock <sup>c</sup><br><small>bioRxiv preprint doi: <a href="https://doi.org/10.1101/2021.03.09.434607">https://doi.org/10.1101/2021.03.09.434607</a>; this version posted June 24, 2021. The copyright holder for this preprint (which was not certified by peer review) is the author/funder, who has granted bioRxiv a license to display the preprint in perpetuity. It is made available under aCC-BY-NC-ND 4.0 International license.</small> | H66R (5.7%)<br>T76I (5.6%)<br>215-216insKLRS (60.9%)<br>H655Y (3.1%)           | 0.06                     | NA                                                 |
| VIR-7832<br>Lineage 1, passage 4                                                                                                                                                                                                                                                                                                                                                                                                                                    | 215-216insKLRS (74.5%)<br>675-679 del (20.6%)                                  | 0.34                     | 5.64                                               |
| VIR-7832<br>Lineage 1, passage 5                                                                                                                                                                                                                                                                                                                                                                                                                                    | 215-216insKLRS (74.6%)<br>675-679del (66.0%)                                   | 0.35                     | 5.93                                               |
| VIR-7832<br>Lineage 1, passage 8                                                                                                                                                                                                                                                                                                                                                                                                                                    | 215-216insKLRS (74.7%)<br>E340A (98.7%)<br>675-679del (84.5%)                  | ND                       | >10                                                |
| VIR-7832<br>Lineage 2, passage 5                                                                                                                                                                                                                                                                                                                                                                                                                                    | 215-216insKLRS (73.9%)<br>675-679del (47.3%)<br>R682W (4.9%)<br>V1128F (3.5%)  | 0.32                     | 5.40                                               |
| VIR-7832<br>Lineage 2, passage 6                                                                                                                                                                                                                                                                                                                                                                                                                                    | 215-216insKLRS (75.3%)<br>675-679del (74.2%)<br>R682W (4.9%)<br>V1128F (30.9%) | 0.39                     | 6.54                                               |

## Supplemental Table 2

| Amino Acid Changes in Spike protein | VIR-7831                                        |                                   | VIR-7832                                        |                                   |
|-------------------------------------|-------------------------------------------------|-----------------------------------|-------------------------------------------------|-----------------------------------|
|                                     | Geomean Neutralization EC <sub>50</sub> (ng/mL) | Fold Change Relative to Wild-Type | Geomean Neutralization EC <sub>50</sub> (ng/mL) | Fold Change Relative to Wild-Type |
| Wild Type                           | 104.46                                          | NA                                | 100.75                                          | NA                                |
| E340A                               | > 10,000                                        | > 107                             | > 10,000                                        | > 107                             |
| R682W                               | 53.96                                           | 0.52                              | 47.78                                           | 0.49                              |
| V1128F                              | 50.65                                           | 0.53                              | 49.69                                           | 0.60                              |

bioRxiv preprint doi: <https://doi.org/10.1101/2021.03.09.434607>; this version posted June 24, 2021. The copyright holder for this preprint (which was not certified by peer review) is the author/funder, who has granted bioRxiv a license to display the preprint in perpetuity. It is made available under aCC-BY-NC-ND 4.0 International license.
